# Supplementary material for: Reactions of hypobromous acid with dimethyl selenide, dimethyl diselenide and other organic selenium compounds: kinetics and product formation
Source: Royal Society of Chemistry journal article supplement (doi:10.1039/d3ew00787a), 2024-01-01
Supplement: d3ew00787a1.pdf [file d3ew00787a1.pdf]

1 SUPPORTING INFORMATION

2

3 **Reactions of bromine with organic selenium compounds:**  
4 **Kinetics and product formation**

5

6

7 Emanuel Müller<sup>†,#</sup>, Urs von Gunten<sup>†,#,§</sup>, Julie Tolu<sup>†,#</sup>, Sylvain Bouchet<sup>†,#</sup> and Lenny H.E. Winkel<sup>†,#,\*</sup>

8

9 <sup>†</sup>Eawag, Swiss Federal Institute of Aquatic Science and Technology, Department of Water Resources  
10 and Drinking Water (W+T), Ueberlandstrasse 133, CH-8600 Duebendorf

11

12 <sup>#</sup>ETH Zurich, Swiss Federal Institute of Technology, Institute of Biogeochemistry and Pollutant  
13 Dynamics (IBP), Department of Environment Systems (D-USYS), Universitätsstrasse 16, 8092 Zürich

14

15 <sup>§</sup> School of Architecture, Civil and Environmental Engineering (ENAC), École Polytechnique Fédérale de  
16 Lausanne (EPFL), 1015, Lausanne, Switzerland

17

18 \*Corresponding author:

19 Lenny H.E.Winkel

20 Email: [lenny.winkel@eawag.ch](mailto:lenny.winkel@eawag.ch),

21 phone: +41 58 765 5601

22

23

**Number of pages: 39**

24

**Number of texts: 11**

25

**Number of tables: 9**

26

**Number of figures: 23**

27

28

29

30

31

32

|    |                                                                                                                                                                                        |            |
|----|----------------------------------------------------------------------------------------------------------------------------------------------------------------------------------------|------------|
| 33 | <b>Table of Contents</b>                                                                                                                                                               |            |
| 34 | <b>Texts</b>                                                                                                                                                                           |            |
| 35 | <b>Text S1:</b> Suggested marine biotic pathways for Selenium and Se compounds .....                                                                                                   | <b>S5</b>  |
| 36 | <b>Text S2:</b> Experimental procedures and list of chemicals .....                                                                                                                    | <b>S5</b>  |
| 37 | <b>Text S3:</b> Method for the production of N-acetylated-Selenomethionine and N-acetylated-                                                                                           |            |
| 38 | Selenocystine .....                                                                                                                                                                    | <b>S8</b>  |
| 39 | <b>Text S4:</b> Test for chloramine formation of N-acetylated-SeMet and N-acetylated-SeCys2 .....                                                                                      | <b>S9</b>  |
| 40 | <b>Text S5:</b> Quantification of Se organic compounds and competitors .....                                                                                                           | <b>S13</b> |
| 41 | <b>Text S6:</b> Determination of limits of quantification for organic selenium compounds and                                                                                           |            |
| 42 | associated reaction competitors .....                                                                                                                                                  | <b>S14</b> |
| 43 | <b>Text S7:</b> Calculation of second-order rate constants for the reactions of organic selenium                                                                                       |            |
| 44 | compounds with HOBr .....                                                                                                                                                              | <b>S15</b> |
| 45 | <b>Text S8:</b> Identification and (semi)quantification of Se-containing oxidation products by HR-MS .....                                                                             | <b>S19</b> |
| 46 | <b>Text S9:</b> Experiments investigating the higher reactivity of DMSe with HOBr in buffered                                                                                          |            |
| 47 | artificial seawater medium compared to buffered ultrapure water .....                                                                                                                  | <b>S33</b> |
| 48 | <b>Text S10:</b> Kinetics of the HOBr-BOC2O reaction .....                                                                                                                             | <b>S25</b> |
| 49 | <b>Text S11:</b> Stoichiometry for reactions between diselenide compounds and HOBr .....                                                                                               | <b>S36</b> |
| 50 |                                                                                                                                                                                        |            |
| 51 | <b>Tables</b>                                                                                                                                                                          |            |
| 52 | <b>Table S1:</b> Suggested marine biotic pathways for Se and the corresponding references .....                                                                                        | <b>S5</b>  |
| 53 | <b>Table S2:</b> Specifications of used chemicals .....                                                                                                                                | <b>S6</b>  |
| 54 | <b>Table S3:</b> Species-specific second-order rate constants for reactions between                                                                                                    |            |
| 55 | protonated/deprotonated HOBr and resorcinol species and $pK_a$ values for different resorcinol species                                                                                 |            |
| 56 | and HOBr .....                                                                                                                                                                         | <b>S11</b> |
| 57 | <b>Table S4:</b> Fractions of resorcinol-species ( $\alpha\text{Res}$ , $\alpha\text{Res}^-$ , $\alpha\text{Res}^{2-}$ ), HOBr/OBr- ( $\alpha\text{HOBr}$ , $\alpha\text{OBr}^-$ ) and |            |
| 58 | derived apparent second-order rate constants for the reactions between resorcinol species and HOBr                                                                                     |            |
| 59 | as a function of the pH .....                                                                                                                                                          | <b>S11</b> |
| 60 | <b>Table S5:</b> Slopes of competition kinetics experiments (reaction of the organic Se compound with                                                                                  |            |
| 61 | HOBr in competition with the reaction of the competitor with HOBr) .....                                                                                                               | <b>S16</b> |
| 62 | <b>Table S6:</b> Slopes of competition kinetics experiments performed in buffered artificial seawater and                                                                              |            |
| 63 | perchlorate medium (= high ionic strength) medium .....                                                                                                                                | <b>S17</b> |
| 64 | <b>Table S7:</b> Concentrations of halides, HOBr and $\text{H}^+$ in DMSe-HOBr experiments performed in buffered                                                                       |            |
| 65 | artificial seawater .....                                                                                                                                                              | <b>S34</b> |
| 66 | <b>Table S8:</b> Concentrations and fractions of $\text{BrCl}$ , $\text{Br}_2\text{O}$ and $\text{Br}_2$ for used HOBr concentrations in                                               |            |
| 67 | buffered artificial seawater medium according to Table S8 at pH 8 .....                                                                                                                | <b>S34</b> |

|     |                                                                                                                              |            |
|-----|------------------------------------------------------------------------------------------------------------------------------|------------|
| 68  | <b>Table S9:</b> Experimental conditions of the HOBr-BOC <sub>2</sub> O kinetic experiment and the determined                |            |
| 69  | apparent second-order rate constants at pH 8 .....                                                                           | <b>S36</b> |
| 70  |                                                                                                                              |            |
| 71  | <b>Figures</b>                                                                                                               |            |
| 72  | <b>Figure S1:</b> Total chlorine (i.e. free available chlorine (FAC = [HOCl] + [OCl <sup>-</sup> ]) and chloramines) as a    |            |
| 73  | function of added HOCl for (A) <i>N</i> -acetylated-SeMet (10.0 μM) and (B) <i>N</i> -acetylated-SeCys <sub>2</sub> (4.9 μM) |            |
| 74  | .....                                                                                                                        | <b>S11</b> |
| 75  | <b>Figure S2:</b> Apparent second-order rate constant of the resorcinol-HOBr reaction as a function of pH                    |            |
| 76  | (based on data “ <i>k</i> <sub>app</sub> ” from Table S4) .....                                                              | <b>S13</b> |
| 77  | <b>Figure S3:</b> Eluent composition of the different HPLC/UV -methods for quantification of resorcinol,                     |            |
| 78  | TMB, DPSe, DPDSe, <i>N</i> -acetylated-SeMet and <i>N</i> -acetylated-SeCys <sub>2</sub> .....                               | <b>S14</b> |
| 79  | <b>Figure S4:</b> Competition kinetics plots of the relative measured organic Se compound and competitor                     |            |
| 80  | concentrations from kinetic experiments with HOBr performed in phosphate-buffered medium at pH                               |            |
| 81  | 8 .....                                                                                                                      | <b>S18</b> |
| 82  | <b>Figure S5:</b> Competition kinetics plots of ln of the relative measured DMSe, DMDSe and competitor                       |            |
| 83  | concentrations from kinetic experiments with HOBr performed in buffered artificial seawater                                  |            |
| 84  | medium/high ionic strength medium at pH 8 .....                                                                              | <b>S19</b> |
| 85  | <b>Figure S6:</b> HR-MS mass spectra (between <i>m/z</i> 100 and 155) for solutions after the reaction between               |            |
| 86  | DMSe and HOBr .....                                                                                                          | <b>S21</b> |
| 87  | <b>Figure S7:</b> LC-ICP-MS/MS chromatograms indicating <sup>80</sup> Se counts for solutions obtained after the             |            |
| 88  | reaction between DMSe and HOBr .....                                                                                         | <b>S22</b> |
| 89  | <b>Figure S8:</b> Semi-quantitative HR-MS data for the product of the reaction between DMSe and HOBr,                        |            |
| 90  | i.e., DMSeO .....                                                                                                            | <b>S23</b> |
| 91  | <b>Figure S9:</b> Semi-quantitative LC-ICP-MS/MS data for DMSeO, confirming the HR-MS data in Figure S8                      |            |
| 92  | .....                                                                                                                        | <b>S23</b> |
| 93  | <b>Figure S10:</b> HR-MS mass spectra (between <i>m/z</i> 200 and 280) for solutions after the reaction between              |            |
| 94  | DPSe and HOBr (two molar ratios) .....                                                                                       | <b>S24</b> |
| 95  | <b>Figure S11:</b> HR-MS mass spectra (between <i>m/z</i> 300 and 365) for solutions after the reaction of <i>N</i> -        |            |
| 96  | acetylated-SeMet and HOBr (two molar ratios) .....                                                                           | <b>S25</b> |
| 97  | <b>Figure S12:</b> HR-MS mass spectra (between <i>m/z</i> 100 and 170) for solutions after the reaction between              |            |
| 98  | DMDSe and HOBr (two molar ratios) .....                                                                                      | <b>S26</b> |
| 99  | <b>Figure S13:</b> LC-ICP-MS/MS chromatograms obtained for solutions after the reaction between DMDSe                        |            |
| 100 | and HOBr (four molar ratios) .....                                                                                           | <b>S27</b> |
| 101 | <b>Figure S14:</b> Semi-quantitative HR-MS data for the reaction between DMDSe and HOBr (four molar                          |            |
| 102 | ratios) .....                                                                                                                | <b>S28</b> |
| 103 | <b>Figure S15:</b> Semi-quantitative LC-ICP-MS/MS data for the reaction between DMDSe and HOBr (four                         |            |
| 104 | molar ratios) .....                                                                                                          | <b>S28</b> |

|     |                                                                                                                                   |            |
|-----|-----------------------------------------------------------------------------------------------------------------------------------|------------|
| 105 | <b>Figure S16:</b> HR-MS mass spectra for solutions after the reaction between DPDSe and HOBr (two                                |            |
| 106 | molar ratios) .....                                                                                                               | <b>S29</b> |
| 107 | <b>Figure S17:</b> HR-MS mass spectra for solutions after the reaction between <i>N</i> -acetylated--SeCys <sub>2</sub> and       |            |
| 108 | HOBr (three molar ratios) .....                                                                                                   | <b>S30</b> |
| 109 | <b>Figure S18:</b> LC-ICP-MS/MS chromatograms indicating <sup>80</sup> Se counts for solutions obtained after the                 |            |
| 110 | reaction between <i>N</i> -acetylated-SeCys <sub>2</sub> (in the figure displayed as SeCys <sub>2</sub> ) and HOBr for four molar |            |
| 111 | ratios .....                                                                                                                      | <b>S31</b> |
| 112 | <b>Figure S19:</b> Semi-quantitative HR-MS data for the product of the reaction between <i>N</i> -acetylated-                     |            |
| 113 | SeCys <sub>2</sub> (in the figure displayed as SeCys <sub>2</sub> ) and HOBr (four molar ratios) .....                            | <b>S32</b> |
| 114 | <b>Figure S20:</b> Semi-quantitative LC-ICP-MS/MS data for the reaction between <i>N</i> -acetylated-SeCys <sub>2</sub> (in       |            |
| 115 | the figure displayed as SeCys <sub>2</sub> ) and HOBr (four molar ratios) .....                                                   | <b>S32</b> |
| 116 | <b>Figure S21:</b> Kinetics of the HOBr- BOC <sub>2</sub> O reaction (pseudo-first order conditions, see Table S9) at pH 8        |            |
| 117 | .....                                                                                                                             | <b>S36</b> |
| 118 | <b>Figure S22:</b> Stoichiometries of reactions between diselenides and HOBr at pH 8 (n=1). (A) DMDS <sub>e</sub> , (B)           |            |
| 119 | DPDSe, (C) <i>N</i> -acetylated-SeCys <sub>2</sub> .....                                                                          | <b>S37</b> |
| 120 | <b>Figure S23:</b> Measured DMS in DMDS <sub>e</sub> samples via DI-SPME-GC/MS .....                                              | <b>S37</b> |
| 121 |                                                                                                                                   |            |
| 122 | <b>References</b> .....                                                                                                           | <b>S38</b> |
| 123 |                                                                                                                                   |            |
| 124 |                                                                                                                                   |            |
| 125 |                                                                                                                                   |            |
| 126 |                                                                                                                                   |            |
| 127 |                                                                                                                                   |            |
| 128 |                                                                                                                                   |            |
| 129 |                                                                                                                                   |            |
| 130 |                                                                                                                                   |            |
| 131 |                                                                                                                                   |            |
| 132 |                                                                                                                                   |            |
| 133 |                                                                                                                                   |            |
| 134 |                                                                                                                                   |            |
| 135 |                                                                                                                                   |            |

136 **Text S1: Suggested marine biotic pathways for Selenium and Se compounds**

137 **Table S1: Suggested marine biotic pathways for Selenium and Se compounds**

| Pathway number | Description of pathway / Observation reported                                          | Reference(s)                                                                                           |
|----------------|----------------------------------------------------------------------------------------|--------------------------------------------------------------------------------------------------------|
| 1              | SeIV/SeVI uptake by algae                                                              | Obata et al. 2004 <sup>1</sup>                                                                         |
| 2              | DMSeP production in microalgae                                                         | Larsen et al. 2001 <sup>2</sup>                                                                        |
| 3              | Microalgae DMSe production, likely from selenonium derivative such as MeSeMet or DMSeP | Fan et al. 1997 <sup>3</sup>                                                                           |
| 4              | Intracellular presence of methylated selenocysteine in microalgae                      | Gómez-Jacinto et al. 2012 <sup>4</sup><br>Wrench 1978 <sup>5</sup><br>Bottino et al. 1984 <sup>6</sup> |
| 5              | Release of organic Se from algae cells                                                 | Hu et al. 1997 <sup>7</sup>                                                                            |
| 6              | Abiotic degradation of SeCys <sub>2</sub> and SeMet in marine waters                   | Amouroux et al. 2000 <sup>8</sup>                                                                      |
| 7              | DMSePd (org Se) uptake by bacteria                                                     | Keine et al. 1998 <sup>9</sup>                                                                         |
| 8              | Inorganic Se uptake by marine bacteria                                                 | Brock et al. 2013 <sup>10</sup><br>Van Fleet-Stalder et al. <sup>11</sup>                              |
| 9              | DMSeP production by marine bacteria (hypothesized)                                     | Brock et al. 2013 <sup>10</sup>                                                                        |
| 10             | DMSeP cleavage to DMSe in marine bacteria                                              | Ansede & Yoch 1997 <sup>12</sup><br>Dickschat et al. 2010 <sup>13</sup>                                |
| 11             | DMSeP demethylation to MeSeH in marine bacteria                                        | Dickschat et al. 2010 <sup>13</sup>                                                                    |
| 12             | Production of DMSe from MeSeH                                                          | Gabel-Jensen et al. 2010 <sup>14</sup>                                                                 |

138

139

140 **Text S2: Experimental procedures and list of chemicals**

141 All glassware was cleaned with 0.5 % nitric acid (Merck, Hohenbrunn, Germany) for 24 hours, rinsed  
 142 with ultrapure water (18 MΩ; Thermo Fisher, Nanopure, Reinach, Switzerland) and then methanol  
 143 (CH<sub>3</sub>OH, LC/MS grade, Fisher Scientific, Loughborough, UK), and finally dried under a fume hood before  
 144 use. All dilutions and compound transfer steps were performed with gastight syringes (Hamilton, 1700  
 145 series, Bonaduz, Switzerland).

146 **Table S2:** Specifications of used chemicals

| Chemical                                                               | Abbreviation                                                       | CAS number | Supplier        | Purity              | Usage                                                                                                                          | Stock solutions                                                | Storage conditions (for the highest concentrated solution) |
|------------------------------------------------------------------------|--------------------------------------------------------------------|------------|-----------------|---------------------|--------------------------------------------------------------------------------------------------------------------------------|----------------------------------------------------------------|------------------------------------------------------------|
| Acetonitrile                                                           | ACN, C <sub>2</sub> H <sub>3</sub> N                               | 75-05-8    | Fisher Chemical | LC/MS grade         | HPLC/UV eluent                                                                                                                 | -                                                              | at 20 °C, in the dark                                      |
| 2,2'-Azino-bis(3-ethylbenzothiazoline-6-sulfonic acid) diammonium salt | ABTS                                                               | 30931-67-0 | Sigma-Aldrich   | >98%                | For quenching HOBr in the BOC <sub>2</sub> O kinetic test. $\lambda=405$ nm; $\epsilon=30226$ M <sup>-1</sup> cm <sup>-1</sup> | 1 g/L in H <sub>2</sub> O                                      | at 4°C, replacement every week                             |
| Deuterated dimethyl sulfide                                            | DMS-d <sub>6</sub> , (CD <sub>3</sub> ) <sub>2</sub>               | 926-09-0   | Sigma-Aldrich   | 99%                 | Internal standard for DMSe                                                                                                     | ≈10 <sup>-2</sup> M and ≈10 <sup>-5</sup> M                    | at -18°C                                                   |
| <i>N,N</i> -Diethyl- <i>p</i> -phenylenediamine sulfate salt           | DPD                                                                | 6283-63-2  | Sigma-Aldrich   | >98%                | used for chloramine test assay                                                                                                 | For production of an acidified DPD solution                    | at 20 °C in the dark                                       |
| Dimethyl diselenide                                                    | DMDSe, (CH <sub>3</sub> Se) <sub>2</sub>                           | 7101-31-7  | Sigma-Aldrich   | 96%                 | For kinetic experiments and product analysis                                                                                   | 25 mM in methanol                                              | at -18°C                                                   |
| Dimethyl selenide                                                      | DMSe, (CH <sub>3</sub> ) <sub>2</sub> Se                           | 593-79-3   | Sigma-Aldrich   | 99%                 | For kinetic experiments and product analysis                                                                                   | 25 mM in methanol                                              | at -18°C                                                   |
| Diphenyl diselenide                                                    | DPDSe, (C <sub>6</sub> H <sub>5</sub> Se) <sub>2</sub>             | 1666-13-3  | Sigma-Aldrich   | 98%                 | For kinetic experiments and product analysis                                                                                   | 6 mM in methanol                                               | at 20 °C in the dark                                       |
| Diphenyl selenide                                                      | DPSe, (C <sub>6</sub> H <sub>5</sub> ) <sub>2</sub> Se             | 1132-39-4  | Sigma-Aldrich   | 96%                 | For kinetic experiments and product analysis                                                                                   | 25 mM in methanol                                              | at 4°C                                                     |
| Di-sodium hydrogen phosphate dihydrate                                 | Na <sub>2</sub> HPO <sub>4</sub> ·2H <sub>2</sub> O                | 10028-24-7 | Sigma-Aldrich   | ≥99%                | Buffer for kinetic experiments; used for chloramine test assay                                                                 | 40 mM for kinetic experiments, 0.4 M for chloramine test assay | at 4°C                                                     |
| Di- <i>tert</i> -butyl dicarbonate                                     | BOC <sub>2</sub> O, C <sub>10</sub> H <sub>18</sub> O <sub>5</sub> | 24424-99-5 | Sigma-Aldrich   | ≥99%                | Prod. of <i>N</i> -acetylated-SeCys <sub>2</sub>                                                                               | 390 mM in methanol                                             | at 4°C                                                     |
| Ethylenediamine tetraacetate disodium salt dihydrate                   | EDTA-Na <sub>2</sub>                                               | 6381-92-6  | Sigma-Aldrich   | 99-101% (titration) | used for chloramine test assay                                                                                                 | Prod. of a 0.4 M PO <sub>4</sub> buffer                        | at 4°C                                                     |
| Formic acid                                                            | FA, CH <sub>2</sub> O <sub>2</sub>                                 | 64-18-6    | Sigma-Aldrich   | >98%                | For Se-product analysis by HR-MS                                                                                               | 10%                                                            | at 20 °C, in the dark                                      |

|                                  |                                                                                      |            |                    |                                          |                                                                |                                                                                                                |                                    |
|----------------------------------|--------------------------------------------------------------------------------------|------------|--------------------|------------------------------------------|----------------------------------------------------------------|----------------------------------------------------------------------------------------------------------------|------------------------------------|
| Hypobromous acid*                | HOBr                                                                                 |            | own production     |                                          | Oxidant for kinetic experiments                                | 10 <sup>-1</sup> M in H <sub>2</sub> O. Produced via the HOCl-Br <sup>-</sup> reaction.                        | at 4°C, replacement every 2 weeks. |
| Mercury chloride                 | HgCl <sub>2</sub>                                                                    | 7487-94-7  | Sigma-Aldrich      | ≥99.5%                                   | used for chloramine test assay                                 | Prod. of a 0.4 M PO <sub>4</sub> buffer                                                                        | at 4°C                             |
| Methane seleninic acid           | MSeIA, CH <sub>3</sub> SeO <sub>2</sub> H                                            | 28274-57-9 | Sigma-Aldrich      | 95%                                      | For Se-product analysis by LC-ICP-MS/MS                        | 12.7 mM                                                                                                        | at 4°C                             |
| Methanol                         | MeOH, CH <sub>3</sub> OH                                                             | 67-56-1    | Fischer Scientific | LC-MS grade                              | For cleaning, stock solutions, HR-MS analysis                  |                                                                                                                | at 20 °C, in the dark              |
| Nitric acid                      | HNO <sub>3</sub>                                                                     | 7697-37-2  | Merck              | ACS reagent grade, assay ≥65%            | For cleaning vials; acidification of HOBr                      | 10%                                                                                                            | at 20 °C, in the dark              |
| Phosphoric acid                  | H <sub>3</sub> PO <sub>4</sub>                                                       | 7664-38-2  | Merck              | 85%                                      | HPLC/UV eluent                                                 | 10 mM                                                                                                          | at 20 °C, in the dark              |
| Potassium bromide                | KBr                                                                                  | 7758-02-3  | Sigma-Aldrich      | >99%                                     | HOBr prod.; for ASW                                            | 840 μM                                                                                                         | at 4°C                             |
| Potassium dihydrogen phosphate   | KH <sub>2</sub> PO <sub>4</sub>                                                      | 7778-77-0  | Fluka              | ≥99.5%                                   | used for chloramine test assay                                 | prod. of a 0.4 M PO <sub>4</sub> buffer for chloramine test assay                                              | at 4°C                             |
| Potassium perchlorate            | KClO <sub>4</sub>                                                                    | 7778-74-7  | Sigma-Aldrich      | ≥99%                                     | Salt to adjust ionic strength                                  | 125 mM                                                                                                         | at 20 °C                           |
| Resorcinol                       | Res, Benzene-1,3-diol, C <sub>6</sub> H <sub>4</sub> (OH) <sub>2</sub>               | 108-46-3   | Sigma-Aldrich      | ≥99%                                     | For kinetic experiments (competitor)                           | 250 mM in H <sub>2</sub> O                                                                                     | at 4°C                             |
| Seleno-L-cystine                 | SeCys2, C <sub>6</sub> H <sub>12</sub> N <sub>2</sub> O <sub>4</sub> Se <sub>2</sub> | 2897-21-4  | Sigma-Aldrich      | >95%                                     | Prod. of <i>N</i> -acetylated-SeCys2                           | 0.6 mM in H <sub>2</sub> O                                                                                     | at 4°C                             |
| Seleno-DL-methionine             | SeMet, C <sub>5</sub> H <sub>11</sub> NO <sub>2</sub> Se                             | 1464-42-2  | Sigma-Aldrich      | ≥99%                                     | Prod. of <i>N</i> -acetylated-SeMet                            | 6 mM in H <sub>2</sub> O                                                                                       | at 4°C                             |
| Sodium chloride (recrystallized) | NaCl                                                                                 | 7647-14-5  | Merck              | >99.5%                                   | For artificial seawater production                             | 0.55 M                                                                                                         | at 4°C                             |
| Sodium hydrogen carbonate        | NaHCO <sub>3</sub>                                                                   | 144-55-8   | Merck              | Reagent grade, 99.0-101.0% (acidimetric) | For acetylation of SeMet and SeCys2; buffer for HR-MS analysis | 1 mM for the use as a buffer                                                                                   | at 20 °C                           |
| Sodium hypochlorite              | NaOCl                                                                                | 7681-52-9  | Sigma-Aldrich      | 6-14% active chlorine                    | Prod. of HOBr; used in the chloramine test assay               | (OCl <sup>-</sup> : λ = 292 nM, ε = 350 M <sup>-1</sup> cm <sup>-1</sup> ). 1 mM for the chloramine test assay | at 4°C                             |

|                         |                                                                     |            |               |                                |                                         |                                                 |                    |
|-------------------------|---------------------------------------------------------------------|------------|---------------|--------------------------------|-----------------------------------------|-------------------------------------------------|--------------------|
| Selenate                | SeO <sub>4</sub> <sup>2-</sup>                                      | 13410-01-0 | Spec-tracer   | ICP mass spectrometry standard | For Se-product analysis by LC-ICP-MS/MS | 12.66 mM                                        | at 4 °C            |
| Selenite                | SeO <sub>3</sub> <sup>2-</sup>                                      | 10102-18-8 | Spec-tracer   | ICP mass spectrometry standard | For Se-product analysis by LC-ICP-MS/MS | 12.66 mM                                        | at 4 °C            |
| Sulfuric acid           | H <sub>2</sub> SO <sub>4</sub>                                      | 7664-93-9  | Sigma-Aldrich | ACS reagent grade (95-98%)     | used for chloramine test assay          | 2%, for production of an acidified DPD solution | 20 °C, in the dark |
| 1,3,5-Trimethoxybenzene | TMB, C <sub>6</sub> H <sub>3</sub> (OCH <sub>3</sub> ) <sub>3</sub> | 621-23-8   | Sigma-Aldrich | ≥99%                           | For kinetic experiments (competitor)    | 2.5 mM in H <sub>2</sub> O                      | at 4 °C            |

147 Further information:

148 \*As HOBr is not stable, its concentration was determined before each experiment spectrophotometrically (via OBr<sup>-</sup>): λ=329

149 nm, ε=345 M<sup>-1</sup> cm<sup>-1</sup>.<sup>15</sup>

150 ASW: artificial seawater medium: [NaCl] = 0.55 M; [KBr] = 840 μM

151 prod. = production

152 Indicated temperatures of -18 °C, 4 °C and 20 °C indicate storage in the freezer, refrigerator and at room temperature,

153 respectively.

154 **Text S3: Method for the production of *N*-acetylated-Selenomethionine and *N*-acetylated-**  
 155 **Selenocystine**

156 The method used to produce *N*-acetylated-selenomethionine (*N*-acetylated-SeMet) and *N*-acetylated-  
 157 selenocystine (*N*-acetylated-SeCys<sub>2</sub>) is described in *McCurry et al. 2016*.<sup>16</sup> Here, we used 20 mL amber  
 158 glass vials with screw caps. A solution of 390 mM BOC<sub>2</sub>O in methanol was produced in a 10 mL  
 159 headspace amber crimp vial and stored in the refrigerator at 4 °C. 5 mL methanol (CH<sub>3</sub>OH, LC/MS grade,  
 160 Fisher Scientific, Loughborough, UK) was added to each vial, followed by the addition of BOC<sub>2</sub>O and  
 161 the Se-amino acid to a total volume of 6 mL and a molar BOC<sub>2</sub>O:Se ratio of 10:1. Finally, 250 g sodium  
 162 hydrogen carbonate (NaHCO<sub>3</sub>, analytical grade, Merck, Hohenbrunn, Germany) was added to the vial.  
 163 The vial was then placed in a beaker half-filled with ultrapure water and sonicated for 30 min in an  
 164 ultrasonic bath (Sonorex Super 10 P, Bandelin electronic GmbH & Co., Berlin, Germany). The cap of the  
 165 vial was slightly opened to avoid overpressure due to CO<sub>2</sub> formation. After sonication and settling of  
 166 solid NaHCO<sub>3</sub>, 5 mL of the sonicated *N*-acetylated-SeMet solution was transferred to a 20 mL amber  
 167 glass vial and mixed with 15 mL H<sub>2</sub>O. The sonicated *N*-acetylated-SeCys<sub>2</sub> solution was directly filtered



168 (without dilution with water) through a 0.45  $\mu\text{m}$  cellulose nitrate syringe filter (Whatman, Luer  
169 connection) and transferred to a 8 mL amber glass vial.

170 Stock solutions of *N*-acetylated-SeMet and *N*-acetylated-SeCys<sub>2</sub> were then quantified for total Se by  
171 ICP-MS/MS and the results were in good agreement with the calculated target concentrations (<3%  
172 deviation). In a separate experiment, the yield of *N*-acetylation of amines via BOC<sub>2</sub>O was tested by  
173 formation of chloramines (Text S4).

#### 174 **Text S4: Test for chloramine formation of *N*-acetylated-SeMet and *N*-acetylated-SeCys<sub>2</sub>**

175 Chlorination of *N*-acetylated Se amino acids was performed to examine the effectiveness of the  
176 derivatization. For fully derivatized amino acids, the *N*-acetylated amino group can no longer react  
177 with HOCl, wherefore, the added chlorine remains in solution and can be detected photometrically by  
178 the *N,N*-diethyl-*p*-phenylenediamine (DPD) method.<sup>17</sup> If the amino acids are not or only partially  
179 derivatized, chlorine reacts with the amino group to the corresponding chloramines and can no longer  
180 be measured directly by DPD. However, upon addition of iodide, hypoiodous acid is formed, which  
181 reacts with DPD.<sup>18</sup> Experiments were carried out with *N*-acetylated-SeMet and various doses of HOCl  
182 in 10 mL amber glass vials under constant stirring. Water and *N*-acetylated-SeMet (final concentration  
183 = 10  $\mu\text{M}$ ) were added to the vial. The reaction was initiated by the addition of HOCl (final concentration:  
184 0-50  $\mu\text{M}$ ; total volume = 4 mL). After one minute reaction time, 2.5 mL of the reaction solution was  
185 transferred to a 1 cm quartz cuvette (Helma Analytics, Müllheim, Germany), where 125  $\mu\text{L}$  of a 0.4 M  
186 PO<sub>4</sub>-buffer solution (containing 269  $\mu\text{M}$  EDTA and 74  $\mu\text{M}$  HgCl<sub>2</sub>) and 125  $\mu\text{L}$  of a DPD solution  
187 (containing 4.2 mM *N,N*-diethyl-*p*-phenylenediamine sulfate salt, 537  $\mu\text{M}$  EDTA, 2% H<sub>2</sub>SO<sub>4</sub>) were  
188 previously added. EDTA and HgCl<sub>2</sub> serve to complex metals and iodide, respectively and thereby  
189 prevent interferences and potential formation of HOI (from the reaction between chloramines and  
190 iodide). The absorption signal was measured 15 seconds later (to ensure the required reaction time  
191 and a constant absorption signal) with a Cary Bio 100 UV-vis spectrophotometer (Varian, Palo Alto,  
192 California, USA) at  $\lambda = 510$  nm. Afterwards, a few crystals of potassium iodide (KI, Merck,  $\geq 99.5\%$ ) were

193 added to the cuvette and dissolved, thereby ensuring that  $[KI] > [Hg^{2+}]$ . The absorption was then  
194 measured again and the obtained signal was compared with the first reading. A higher second reading  
195 indicates chloramine formation and therefore an incomplete acetylation of the amine group. An  
196 unaltered signal indicates the absence of chloramines and thus unreactive amine groups,  
197 demonstrating that the *N*-acetylation procedure was effective.

198 Tests for *N*-acetylated-SeCys<sub>2</sub> were performed similarly to the procedure described for SeMet but  
199 using a reaction volume of 3.5 mL and a final *N*-acetylated-SeCys<sub>2</sub> concentration of 4.9 μM.

200 No chloramine formation was observed in the experiment with *N*-acetylated-SeMet, as the signal  
201 before and after KI-addition is identical (Figure S1A). It is also visible that the difference between added  
202 HOCl and quantified total chlorine (via oxidized DPD) corresponds exactly to the concentration of *N*-  
203 acetylated-SeMet (with a slope of 1 regarding  $\Delta_{\text{total chlorine}}/\Delta_{\text{added HOCl}}$  after the reaction of HOCl  
204 with Se in the *N*-acetylated-SeMet). However, for *N*-acetylated-SeCys<sub>2</sub> chloramine formation is  
205 observed which indicates an incomplete *N*-acetylation of the amino group (Figure S1B). Ca. 20 μM  
206 HOCl are consumed by *N*-acetylated-SeCys<sub>2</sub>. HOCl consumption can be explained by the three-step-  
207 oxidation of diselenides as seen for HOBr (see main text) and oxidation of non-*N*-acetylated amino  
208 groups. Quantified total chlorine after KI-addition is up to 3 μM (average 1.6 μM) higher compared to  
209 the first reading. However, the concentration of produced chloramine for different HOCl doses  
210 (representing the different data points in Figure S1) is inconsistent and the fraction of incomplete *N*-  
211 acetylated amino groups is difficult to predict (2.5 – 58%, average: 33%). Despite the still available  
212 amino groups in solutions of *N*-acetylated-SeCys<sub>2</sub>, it can be excluded that the amino group will  
213 influence the kinetics of the reaction between *N*-acetylated-SeCys<sub>2</sub> and HOBr, because (i) the reactivity  
214 between HOBr and primary amines is around  $10^6 \text{ M}^{-1} \text{ s}^{-1}$  at pH 8<sup>19,20</sup> which is 1-2 orders of magnitude  
215 lower than the observed reactivity between HOBr and *N*-acetylated-SeCys<sub>2</sub> and (ii) there is no HOBr-  
216 reactivity difference reported for methionine and *N*-acetylated methionine,<sup>19</sup> which points to a limited  
217 influence of the amino group for the overall reactivity.

218 The apparent second-order rate constants for the reactions between resorcinol and HOBr/OBr<sup>-</sup> can be  
 219 expressed by equation S1, with values indicated in Table S4 and graphic representation in Figure S2:

$$220 \quad k_{app}(\text{Res}+\text{HOBr}) = k(\text{Res}+\text{HOBr}) \times \alpha_{\text{Res}} \times \alpha_{\text{HOBr}} + k(\text{Res}^-\text{+HOBr}) \times \alpha_{\text{Res}^-} \times \alpha_{\text{HOBr}} + k(\text{Res}^{2-}\text{+HOBr}) \times$$

$$221 \quad \alpha_{\text{Res}^{2-}} \times \alpha_{\text{HOBr}} + k(\text{Res}^{2-}\text{+OBr}^-) \times \alpha_{\text{Res}^{2-}} \times \alpha_{\text{OBr}^-} \quad (\text{equation S1})$$

222 where

- 223 •  $k_{app}(\text{Res}+\text{HOBr})$  is the pH-dependent apparent second-order rate constant of the HOBr-resorcinol reaction
- 224
- 225 •  $k(\text{Res}+\text{HOBr})$ ,  $k(\text{Res}^-\text{+HOBr})$ ,  $k(\text{Res}^{2-}\text{+HOBr})$  and  $k(\text{Res}^{2-}\text{+OBr}^-)$  are the species-specific second-order rate constants for the reactions between protonated/deprotonated resorcinol species and HOBr (as indicated in Table S3)
- 226
- 227
- 228 •  $\alpha_{\text{Res}}$ ,  $\alpha_{\text{Res}^-}$  and  $\alpha_{\text{Res}^{2-}}$  are the fractions of protonated and deprotonated resorcinol-species based on  $pK_a$  values (Table S4) and the actual pH
- 229
- 230 •  $\alpha_{\text{HOBr}}$ ,  $\alpha_{\text{OBr}^-}$  the protonated and deprotonated fractions of HOBr/OBr<sup>-</sup> based on  $pK_a$  values (Table S4) and the actual pH
- 231
- 232
- 233

A

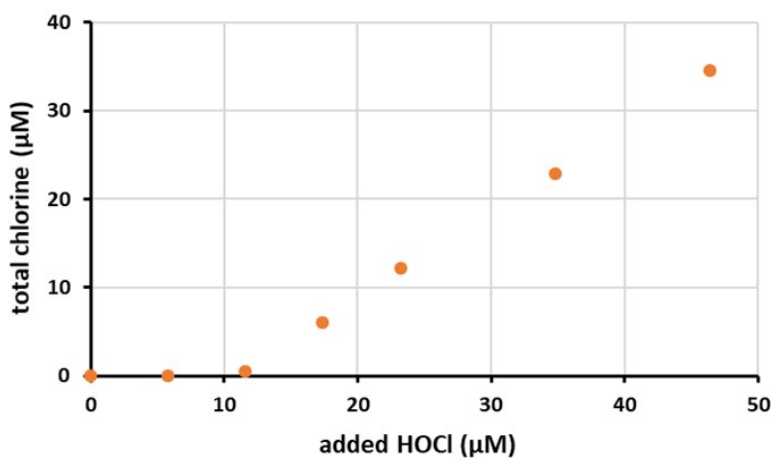

B

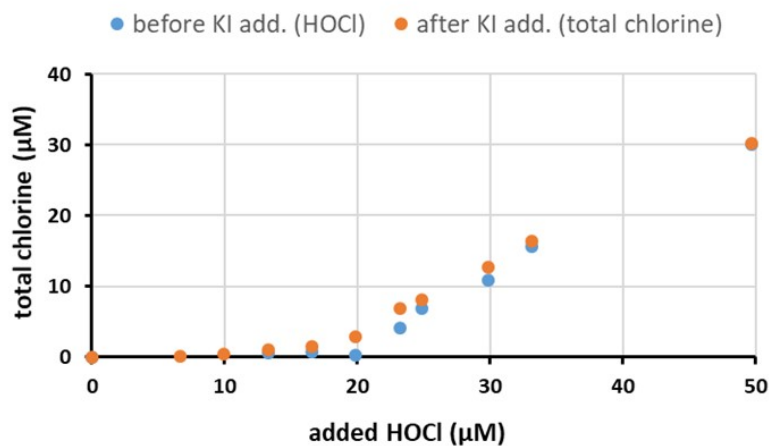

234

235 **Figure S1:** Total chlorine (i.e. free available chlorine (FAC = [HOCl] + [OCl<sup>-</sup>]) and chloramines) as a  
 236 function of added HOCl for (A) *N*-acetylated-SeMet (10.0 μM) and (B) *N*-acetylated-SeCys<sub>2</sub> (4.9 μM).  
 237 FAC and total chlorine were quantified photometrically via oxidation of DPD at λ = 510 nm before and  
 238 after KI addition, respectively. For Panel A, only values are shown after KI addition because of an  
 239 insignificant difference to values before KI addition.

240 **Table S3:** Species-specific second-order rate constants for reactions between  
 241 protonated/deprotonated HOBr and resorcinol species and pK<sub>a</sub> values for different resorcinol species  
 242 and HOBr.

| Reaction or acid-base equilibrium                      | Species-specific second-order rate constants or pK <sub>a</sub> values | Unit                            | Reference                          |
|--------------------------------------------------------|------------------------------------------------------------------------|---------------------------------|------------------------------------|
| $k(\text{Res}+\text{HOBr})$                            | $7.90 \times 10^6$                                                     | M <sup>-1</sup> s <sup>-1</sup> | Criquet et al. 2015 <sup>21</sup>  |
| $k(\text{Res}^+\text{+HOBr})$                          | $3.50 \times 10^8$                                                     | M <sup>-1</sup> s <sup>-1</sup> | Criquet et al. 2015 <sup>21</sup>  |
| $k(\text{Res}^{2-}\text{+HOBr})$                       | $2.10 \times 10^9$                                                     | M <sup>-1</sup> s <sup>-1</sup> | Criquet et al. 2015 <sup>21</sup>  |
| $k(\text{Res}^{2-}\text{+OBr}^-)$                      | $1.50 \times 10^6$                                                     | M <sup>-1</sup> s <sup>-1</sup> | Criquet et al. 2015 <sup>21</sup>  |
| pK <sub>a</sub> (Res/Res <sup>-</sup> )                | 9.4                                                                    |                                 | Criquet et al. 2015 <sup>21</sup>  |
| pK <sub>a</sub> (Res <sup>-</sup> /Res <sup>2-</sup> ) | 11.2                                                                   |                                 | Criquet et al. 2015 <sup>21</sup>  |
| pK <sub>a</sub> (HOBr/OBr <sup>-</sup> )               | 8.8                                                                    |                                 | Troy & Margerum 1991 <sup>22</sup> |

243

244 **Table S4:** Fractions of resorcinol-species (αRes, αRes<sup>-</sup>, αRes<sup>2-</sup>), HOBr/OBr<sup>-</sup> (αHOBr, αOBr<sup>-</sup>) and derived  
 245 apparent second-order rate constants for the reactions between resorcinol species and HOBr as a  
 246 function of the pH: ( $k(\text{Res}+\text{HOBr})$ ,  $k(\text{Res}^+\text{+HOBr})$ ,  $k(\text{Res}^{2-}\text{+HOBr})$ ,  $k(\text{Res}^{2-}\text{+OBr}^-)$ ). The sum of  
 247  $k(\text{Res}+\text{HOBr})$ ,  $k(\text{Res}^+\text{+HOBr})$ ,  $k(\text{Res}^{2-}\text{+HOBr})$  and  $k(\text{Res}^{2-}\text{+OBr}^-)$  displays the apparent second-order rate  
 248 constant of the resorcinol-HOBr reaction ( $k_{\text{app}}$ ) at a given pH.

| pH | αRes   | αRes <sup>-</sup> | αRes <sup>2-</sup> | αHOBr  | αOBr <sup>-</sup> | $k(\text{Res}+\text{HOBr})$     | $k(\text{Res}^+\text{+HOBr})$   | $k(\text{Res}^{2-}\text{+HOBr})$ | $k(\text{Res}^{2-}\text{+OBr}^-)$ | $k_{\text{app}}$                     |
|----|--------|-------------------|--------------------|--------|-------------------|---------------------------------|---------------------------------|----------------------------------|-----------------------------------|--------------------------------------|
|    |        |                   |                    |        |                   | M <sup>-1</sup> s <sup>-1</sup> | M <sup>-1</sup> s <sup>-1</sup> | M <sup>-1</sup> s <sup>-1</sup>  | M <sup>-1</sup> s <sup>-1</sup>   | M <sup>-1</sup> s <sup>-1</sup>      |
| 6  | 0.9996 | 0.0004            | 0.0000             | 0.9984 | 0.0016            | $7.88 \times 10^6$              | $1.39 \times 10^5$              | $5.26 \times 10^0$               | $5.96 \times 10^{-6}$             | <b><math>8.02 \times 10^6</math></b> |
| 7  | 0.9960 | 0.0040            | 0.0000             | 0.9844 | 0.0156            | $7.75 \times 10^6$              | $1.37 \times 10^6$              | $5.17 \times 10^2$               | $5.85 \times 10^{-3}$             | <b><math>9.11 \times 10^6</math></b> |
| 8  | 0.9617 | 0.0383            | 0.0000             | 0.8632 | 0.1368            | $6.56 \times 10^6$              | $1.16 \times 10^7$              | $4.38 \times 10^4$               | $4.95 \times 10^0$                | <b><math>1.82 \times 10^7</math></b> |
| 9  | 0.7153 | 0.2847            | 0.0018             | 0.3869 | 0.6131            | $2.19 \times 10^6$              | $3.86 \times 10^7$              | $1.45 \times 10^6$               | $1.64 \times 10^3$                | <b><math>4.22 \times 10^7</math></b> |
| 10 | 0.2008 | 0.7992            | 0.0474             | 0.0594 | 0.9406            | $9.41 \times 10^4$              | $1.66 \times 10^7$              | $5.91 \times 10^6$               | $6.69 \times 10^4$                | <b><math>2.27 \times 10^7</math></b> |
| 11 | 0.0150 | 0.6131            | 0.3869             | 0.0063 | 0.9937            | $7.44 \times 10^2$              | $1.35 \times 10^6$              | $5.09 \times 10^6$               | $5.77 \times 10^5$                | <b><math>7.02 \times 10^6</math></b> |
| 12 | 0.0003 | 0.1368            | 0.8632             | 0.0006 | 0.9994            | $1.71 \times 10^0$              | $3.02 \times 10^4$              | $1.14 \times 10^6$               | $1.29 \times 10^6$                | <b><math>2.47 \times 10^6</math></b> |

249

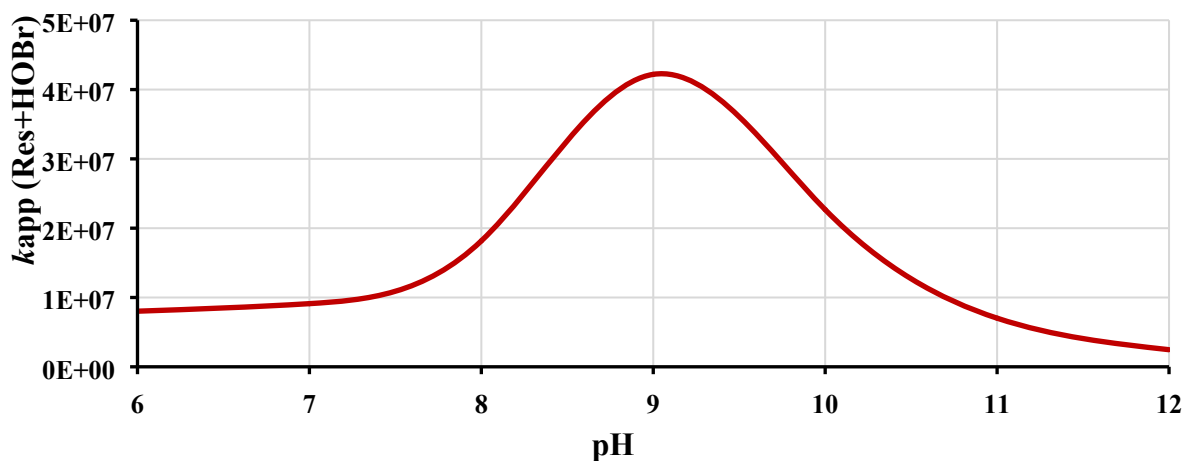

250

251 **Figure S2:** Apparent second-order rate constant of the resorcinol-HOBr reaction as a function of pH  
 252 (based on data " $k_{app}$ " from Table S4)

253 **Text S5: Quantification of Se organic compounds and competitors**

254 We used deuterated dimethyl sulfide (DMS-d6) as an internal standard for DMSe, as described in  
 255 *Vriens et al. 2015*.<sup>23</sup> For DMDS<sub>2</sub>, better results were obtained when its quantification was based on  
 256 counts (without using an internal standard). Concentrations of DPSe, DPDS<sub>2</sub>, *N*-acetylated-SeMet, *N*-  
 257 acetylated-SeCys<sub>2</sub>, resorcinol and TMB were quantified by HPLC/UV, using a Dionex Ultimate 3000  
 258 HPLC system (Thermo Fisher Scientific, Waltham, Massachusetts, USA) and a Cosmosil C<sub>18</sub> column (3.0  
 259 ID X 100 mm; Nacalai Tesque, Inc., Kyoto, Japan). Separation of DPSe and DPDS<sub>2</sub> was achieved with an  
 260 isocratic elution using a methanol/10 mM phosphoric acid eluent, whereas *N*-acetylated-SeMet, *N*-  
 261 acetylated-SeCys<sub>2</sub> and resorcinol were separated using a gradient elution, with an acetonitrile/10 mM  
 262 phosphoric acid eluent (Figure S3). For TMB quantification, an acetonitrile/10 mM phosphoric acid  
 263 eluent was used under isocratic conditions (Figure S3). A photodiode array detector (Dionex PDA-3000)  
 264 was used to quantify DPSe, DPDS<sub>2</sub>, *N*-acetylated-SeMet, *N*-acetylated-SeCys<sub>2</sub>, resorcinol and TMB at  
 265 254 nm, 254 nm, 220 nm, 208 nm, 273 nm, and 208 nm, respectively.

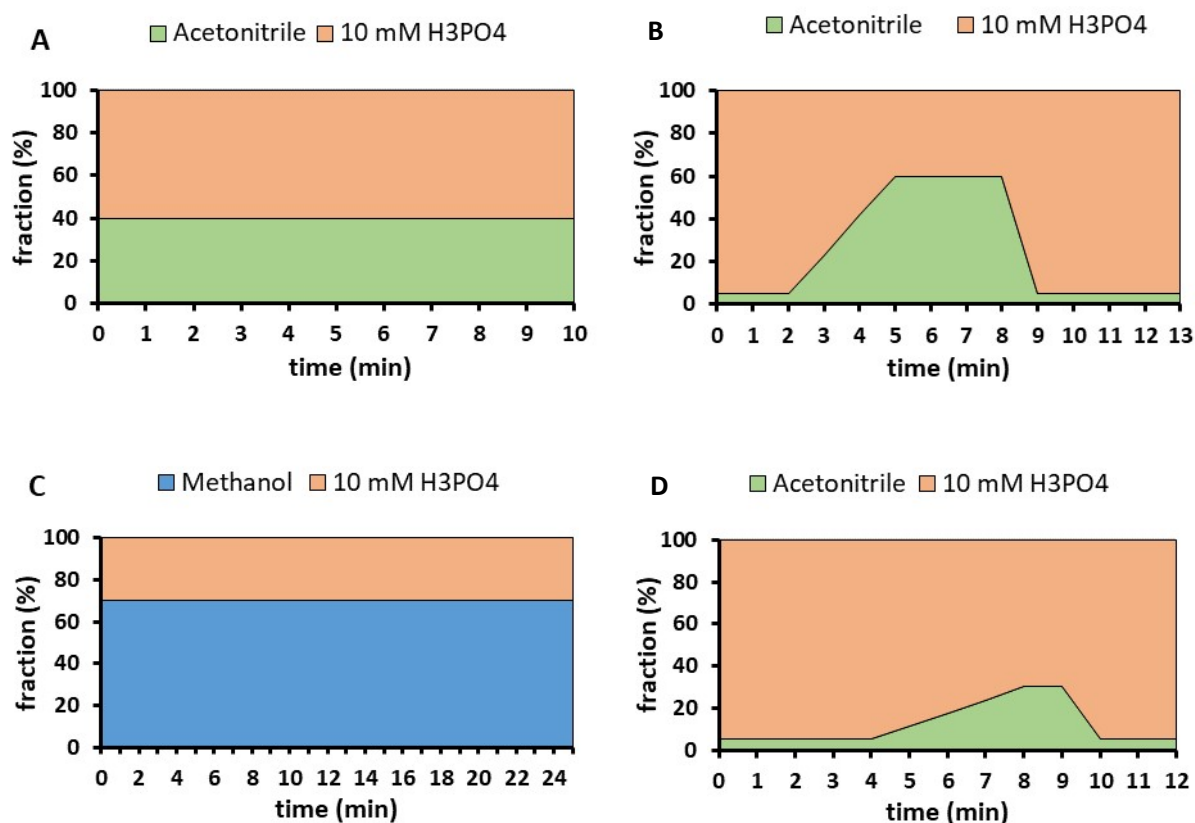

268

269 **Figure S3:** Eluent composition of the different HPLC/UV -methods for quantification of resorcinol, TMB,  
 270 DPSe, DPDS<sub>2</sub>, *N*-acetylated-SeMet and *N*-acetylated-SeCys<sub>2</sub>.

271 A: TMB quantification: Acetonitrile – 10 mM H<sub>3</sub>PO<sub>4</sub> (isocratic); flow rate: 0.6 mL min<sup>-1</sup>

272 B: Resorcinol and *N*-acetylated-SeMet quantification: Acetonitrile – 10 mM H<sub>3</sub>PO<sub>4</sub> (gradient); flow rate:  
 273 0.8 mL min<sup>-1</sup>

274 C: DPSe, DPDS<sub>2</sub> quantification: Methanol – 10 mM H<sub>3</sub>PO<sub>4</sub> (isocratic); flow rate: 0.6 mL min<sup>-1</sup>

275 D: *N*-acetylated-SeCys<sub>2</sub> quantification: Acetonitrile – 10 mM H<sub>3</sub>PO<sub>4</sub> (soft gradient); flow rate: 0.8 mL  
 276 min<sup>-1</sup>

277 **Text S6: Determination of limits of quantification for organic selenium compounds and associated**  
 278 **reaction competitors**

279 The limits of quantification (LOQ) for DMSe and DMDSe were calculated based on standard deviations  
 280 of blanks relative to the calibration slope (Hubaux and Vos formula, equation S2),<sup>24</sup> while LOQs for  
 281 DPSe, DPDS<sub>2</sub>, resorcinol and TMB were calculated based on the noise of the baseline relative to the  
 282 signal of a standard (eq. S3). This method was not applied to *N*-acetylated-SeMet and *N*-acetylated-  
 283 SeCys<sub>2</sub> due to an observed baseline drift. Instead, LOQs for these compounds were determined in an  
 284 equivalent way compared to DMSe and DMDSe, but using a series of low-concentrated standard  
 285 samples (eq. S4).

286  $LOQ_{DMSe, DMDSe} = 10 \times SD_{Blanks} / S_{cal}$  (equation S2)

287 where

- 288 •  $SD_{Blanks}$  is the standard deviation of the blanks (counts)
- 289 •  $S_{cal}$  is the slope of the calibration (counts per concentration unit)

290  $LOQ_{DPSe, DPSe, Res, TMB} = 10 \times noise = 10 \times H_{noise} / H_{Standard} \times C_{Standard}$  (equation S3)

291 where

- 292 •  $H_{noise}$  is the height of the noise of the baseline (mAU)
- 293 •  $H_{Standard}$  is the height of the noise of the lowest standard (mAU)
- 294 •  $C_{Standard}$  is the concentration of the lowest standard (M)

295  $LOQ_{N-acetylated-SeMet, N-acetylated-SeCys2} = 10 \times SD_{standard} / S_{cal}$  (equation S4)

296 where

- 297 •  $SD_{standard}$  is the standard deviation of the signal of a series of low-concentrated standards
- 298 •  $S_{cal}$  is the average signal for the target concentration

299 **Text S7: Calculation of second-order rate constants for the reactions of organic selenium**  
 300 **compounds with HOBr**

301 Results from competition kinetics were analyzed by eqs. S5 and S6.<sup>25</sup>

302 Selenium species and resorcinol (for DPSe: TMB) compete with each other for their reaction with  
 303 HOBr (competition kinetics). Based on the fraction of resorcinol and the Se organic compound that  
 304 reacted with HOBr, a slope is derived:

305  $\ln\left(\frac{[Se]}{[Se]_0}\right) = \ln\left(\frac{[Res]}{[Res]_0}\right) \frac{k_{app, HOBr + Se}}{k_{app, HOBr} + Res}$  (equation S5)

306  $slope = \frac{k_{app, HOBr + Se}}{k_{app, HOBr} + Res}$   
 307 (equation S6)

308 where

- 309 •  $[Se]_0$  is the initial concentration of the organic Se compound (before reaction)
- 310 •  $[Se]$  is the residual concentration of the organic Se compound (after reaction)
- 311 •  $[Res]_0$  is the initial concentration of resorcinol (before reaction)
- 312 •  $[Res]$  is residual concentration of resorcinol (after reaction)
- 313 •  $k_{app}(HOBr+Se)$  is the apparent second-order rate constant for the reaction between HOBr and  
 314 the organic Se compound

315 •  $k_{app}(\text{HOBr}+\text{Res})$  is the apparent second-order rate constant for the reaction between HOBr and  
 316 resorcinol

317 Multiplication of this slope with the apparent second-order rate constant for the reaction between  
 318 resorcinol and HOBr results in the apparent second-order rate constant ( $k_{app}(\text{Se}+\text{HOBr})$ ) of the reaction  
 319 between the organic Se compound and HOBr (eq. S7):

320  $k_{app}(\text{HOBr}+\text{Se}) = \text{slope} \times k_{app}(\text{HOBr}+\text{Res})$  (equation S7)

321  $k_{app}(\text{HOBr}+\text{Se})$  was calculated for pH 8 based on the slopes indicated in Tables S5 and S6, and equation  
 322 S7.

323 **Table S5:** Slopes of competition kinetics experiments (reaction of the organic Se compound with  
 324 HOBr in competition with the reaction of the competitor with HOBr). The slopes represent the ratios  
 325 of the 2<sup>nd</sup> order rate constants (Se-HOBr vs competitor-HOBr reactivity).

326 Conditions: pH 8

327 Competitor: resorcinol or TMB

328 Buffer media:

329  $[\text{PO}_4]_{\text{tot}} = 20 \text{ mM}$  for experiments with DMSe, DMDSe, DPSe and *N*-acetylated-SeMet

330  $[\text{PO}_4]_{\text{tot}} = 10 \text{ mM}$  for experiments with DPDSe and *N*-acetylated-SeCys<sub>2</sub>

|                    | <b>DMSe</b> | <b>DMDSe</b> | <b>DPSe</b> | <b>DPDSe</b> | <i>N</i> -acetylated- <b>SeMet</b> | <i>N</i> -acetylated- <b>SeCys<sub>2</sub></b> |
|--------------------|-------------|--------------|-------------|--------------|------------------------------------|------------------------------------------------|
| Replicate 1        | 4.1         | 2.6          | 2.0         | 3.0          | 13.8                               | 2.1                                            |
| Replicate 2        | 3.4         | 2.0          | 1.9         | 2.7          | 15.6                               | 2.0                                            |
| Replicate 3        | 4.0         | 2.4          | 1.8         | 2.8          | 16.7                               | 2.2                                            |
| Replicate 4        | 4.2         | 2.4          |             |              |                                    | 2.2                                            |
| Replicate 5        |             | 2.4          |             |              |                                    |                                                |
| Replicate 6        |             | 2.1          |             |              |                                    |                                                |
| <b>average</b>     | <b>3.9</b>  | <b>2.3</b>   | <b>1.9</b>  | <b>2.8</b>   | <b>15.3</b>                        | <b>2.1</b>                                     |
| standard deviation | 0.4         | 0.2          | 0.1         | 0.1          | 1.5                                | 0.1                                            |

331

332

333

334

335

336

337



338

339

340 **Table S6:** Slopes of competition kinetics experiments performed in buffered artificial seawater and  
341 perchlorate medium (= high ionic strength) medium. The slopes represent the ratios of the 2<sup>nd</sup> order  
342 rate constants (Se-HOBr vs competitor-HOBr reactivity).

343 Conditions: pH 8

344 Competitor: resorcinol

345 Buffer media:

346 DMSe<sub>seawater</sub>: [PO<sub>4</sub>]<sub>tot</sub> = 20 mM, [NaCl] = 0.55 M, [KBr] = 840 μM

347 DMDS<sub>seawater</sub>: [PO<sub>4</sub>]<sub>tot</sub> = 20 mM, [NaCl] = 0.55 M, [KBr] = 840 μM

348 DMSe<sub>seawater (without Br-)</sub>: [PO<sub>4</sub>]<sub>tot</sub> = 20 mM, [NaCl] = 0.55 M

349 DMSe<sub>perchlorate</sub>: [PO<sub>4</sub>]<sub>tot</sub> = 20 mM, [NaClO<sub>4</sub>] = 0.55 M

350 The slope value for DMSe<sub>seaw</sub> (26.0±2.8) is far beyond 10 and therefore not ideal for an exact  
351 quantification of kDMSe+HOBr in seawater medium. We used resorcinol and not sulfite (with a  
352 higher rate constant) because of sulfite oxidation by the DMSe oxidation product (i.e. DMSeO). Still,  
353 the decrease of resorcinol was large enough to enable a precise quantification by HPLC/UV. The  
354 coefficient of determination (R<sup>2</sup>) for the two replicates was 0.95 and 0.96

|                    | <b>DMSe<sub>seaw</sub></b> | <b>DMDS<sub>seaw</sub></b> | <b>DMSe<sub>seaw (without Br-)</sub></b> | <b>DMSe<sub>perchl.</sub></b> |
|--------------------|----------------------------|----------------------------|------------------------------------------|-------------------------------|
| Replicate 1        | 24.0                       | 2.5                        | 7.3                                      | 13.7                          |
| Replicate 2        | 28.0                       | 2.4                        |                                          | 7.1                           |
| <b>average</b>     | <b>26.0</b>                | <b>2.5</b>                 | <b>7.3</b>                               | <b>10.5</b>                   |
| standard deviation | 2.8                        | 0.1                        | -                                        | 3.3                           |

355

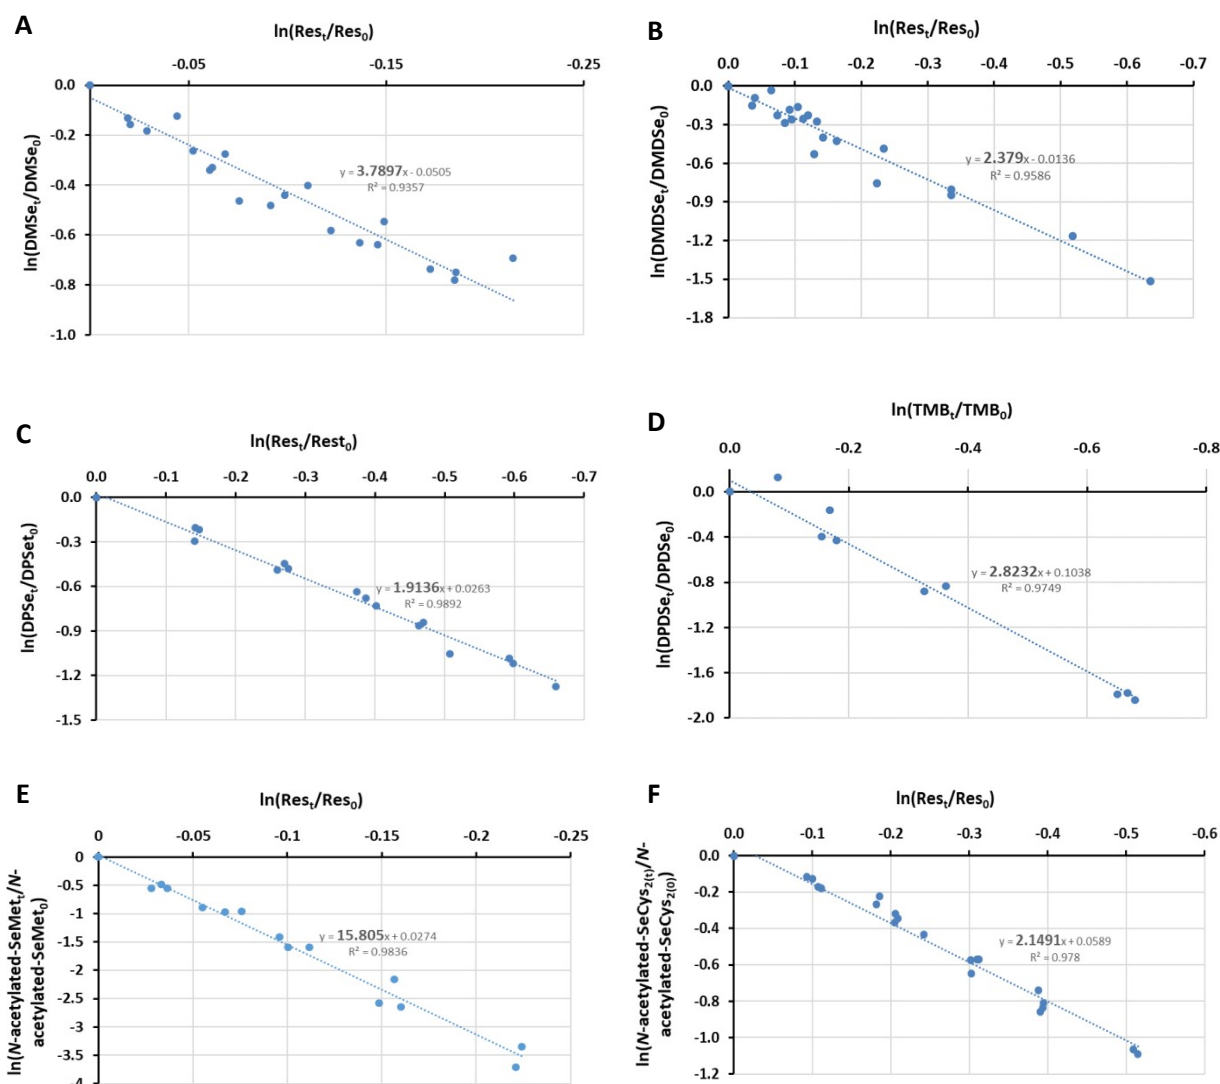

357

358 **Figure S4:** Competition kinetics plots of the  $\ln$  of the relative residual concentrations of target organic  
 359 Se compounds and competitors from kinetic experiments with HOBr performed in phosphate-buffered  
 360 medium at pH 8. The plots include all data points from all replicates (Table S5) and the slopes represent  
 361 the average slopes from all experiments. Average slope values are slightly different compared to Table  
 362 S5 because in this figure the data points are fitted to a linear regression, representing the slopes in  
 363 equations S5 - S7 and not calculated as an average as in Table S5. (A) DMSe, (B) DMDSe, (C) DPSe, (D)  
 364 DPDSe, (E) *N*-acetylated-SeMet, (F) *N*-acetylated-SeCys<sub>2</sub>. Conditions: pH 8, competitor: resorcinol (Res)  
 365 or TMB as indicated at the X-axes.

366 Buffer media:

367  $[\text{PO}_4]_{\text{tot}} = 20 \text{ mM}$  for experiments with DMSe, DMDSe, DPSe and *N*-acetylated-SeMet

368  $[\text{PO}_4]_{\text{tot}} = 10 \text{ mM}$  for experiments with DPDSe and *N*-acetylated-SeCys<sub>2</sub>

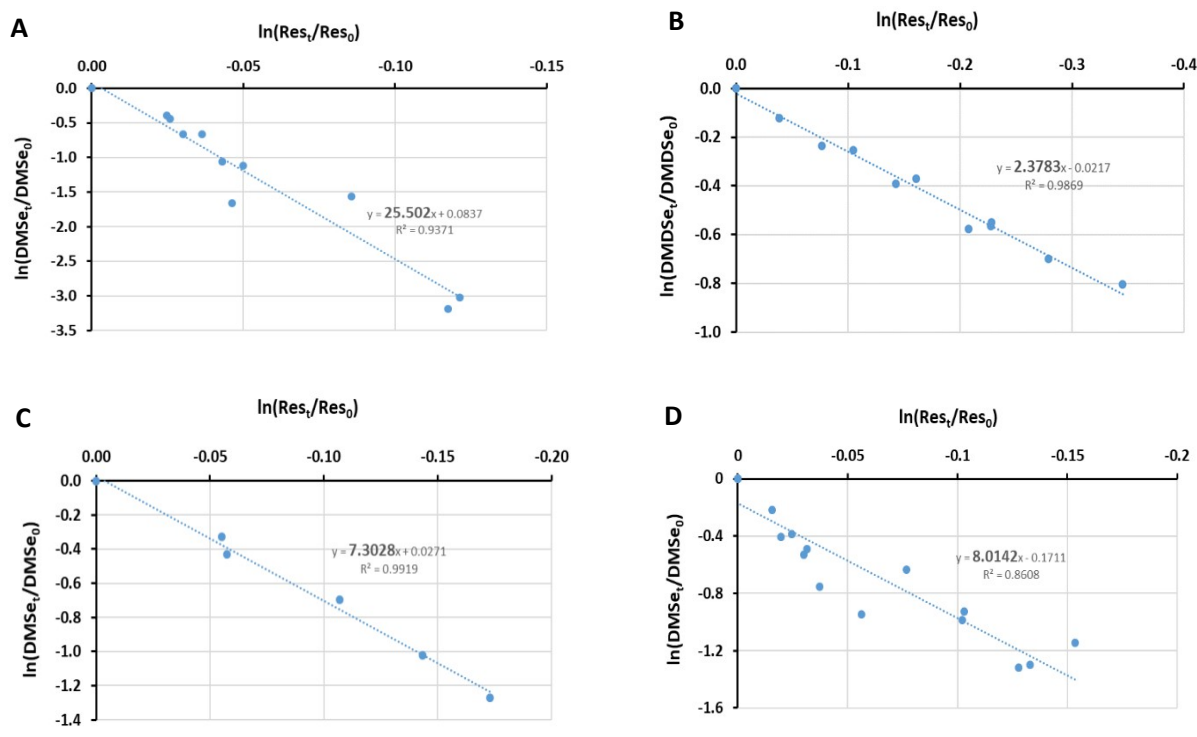

369

370 **Figure S5:** Competition kinetics plots of  $\ln$  of the measured relative residual concentrations of DMSe,  
 371 DMDSe and competitors from kinetic experiments with HOBr performed in buffered artificial seawater  
 372 medium/high ionic strength medium at pH 8. The plots include all data points and derive an average  
 373 slope of all data from different experiments. The average slope values are slightly different compared  
 374 to Table S6 because in this figure data points are fitted to a linear regression, representing the slopes  
 375 in equations S5 - S7 and not calculated as an average as in Table S6. (A) DMSe in buffered seawater  
 376 medium, (B) DMDSe in buffered seawater medium, (C) DMSe in buffered seawater medium without  
 377 Br<sup>-</sup>, (D) DMSe in buffered perchlorate medium with the same ionic strength as the seawater medium.

378 Conditions: pH 8

379 Competitor: resorcinol

380 Buffer media:

381 DMSe<sub>seawater</sub>: [PO<sub>4</sub>]<sub>tot</sub> = 20 mM, [NaCl] = 0.55 M, [KBr] = 840 μM

382 DMDSe<sub>seawater</sub>: [PO<sub>4</sub>]<sub>tot</sub> = 20 mM, [NaCl] = 0.55 M, [KBr] = 840 μM

383 DMSe<sub>seawater (without Br<sup>-</sup>)</sub>: [PO<sub>4</sub>]<sub>tot</sub> = 20 mM, [NaCl] = 0.55 M

384 DMSe<sub>perchlorate</sub>: [PO<sub>4</sub>]<sub>tot</sub> = 20 mM, [Na-perchlorate] = 0.55 M

### 385 **Text S8: Identification and (semi)quantification of Se-containing oxidation products by HR-MS**

386 Preliminary HR-MS analyses demonstrated that the Se-containing oxidation products were either not  
 387 ionized in negative ion mode or were ionized in both negative and positive ion modes (e.g., *N*-  
 388 acetylated-SeMet). All analyses were thus performed in positive ion mode (direct infusion) with the  
 389 following settings: syringe pump flow rate: 10 μL min<sup>-1</sup>, ESI spray voltage: +3.0 kV; sheath gas flow rate:  
 390 5; capillary temperature: 320 °C; S-lens RF level: 55; automatic gain control: 1 × 10<sup>6</sup> (maximum

391 accumulation time of 50 ms), and resolution: 240'000. Samples were loaded to the ESI source using  
392 the instrument's built-in syringe pump and a Hamilton syringe (500  $\mu$ L) connected to the ESI source via  
393 PEEK tubing.

394 To identify the Se-containing oxidation products by looking for the Se isotopic pattern, full mass  
395 spectra with different  $m/z$  ranges (e.g., 60-1000, 60-200, 200-400, 400-600) were recorded for all  
396 samples. For the compound identification with the software Freestyle (Thermo Scientific), the "predict  
397 composition" function was used with a mass tolerance of 5 ppm and allowing for the presence of N,  
398 O, C, H, S, Cl, P, Na, K, Br and Se. For the semi-quantification of the identified Se-containing oxidation  
399 products, single ion mode (SIM) spectra at the nominal mass  $\pm 0.2$  were recorded.

400 The notation of the detected masses of the identified organic Se compounds/oxidation products as  
401 well as the calculation of the mass accuracy ( $\Delta$ ppm; equation S8) follow the recommendation by  
402 Brenton and Godfrey (2010).<sup>26</sup>

$$\Delta ppm = \frac{(m_i - m_a)}{m_a} \cdot 10^6 \quad (\text{equation S8})$$

403 where

- 404 •  $\Delta$ ppm represents the mass accuracy (in parts per million) and can be positive or negative;
- 405 •  $m_i$  is the measured  $m/z$ ; and  $m_a$  is the calculated (theoretical)  $m/z$  obtained using the Eawag  
406 Web-interface "enviPath".<sup>27</sup>

407

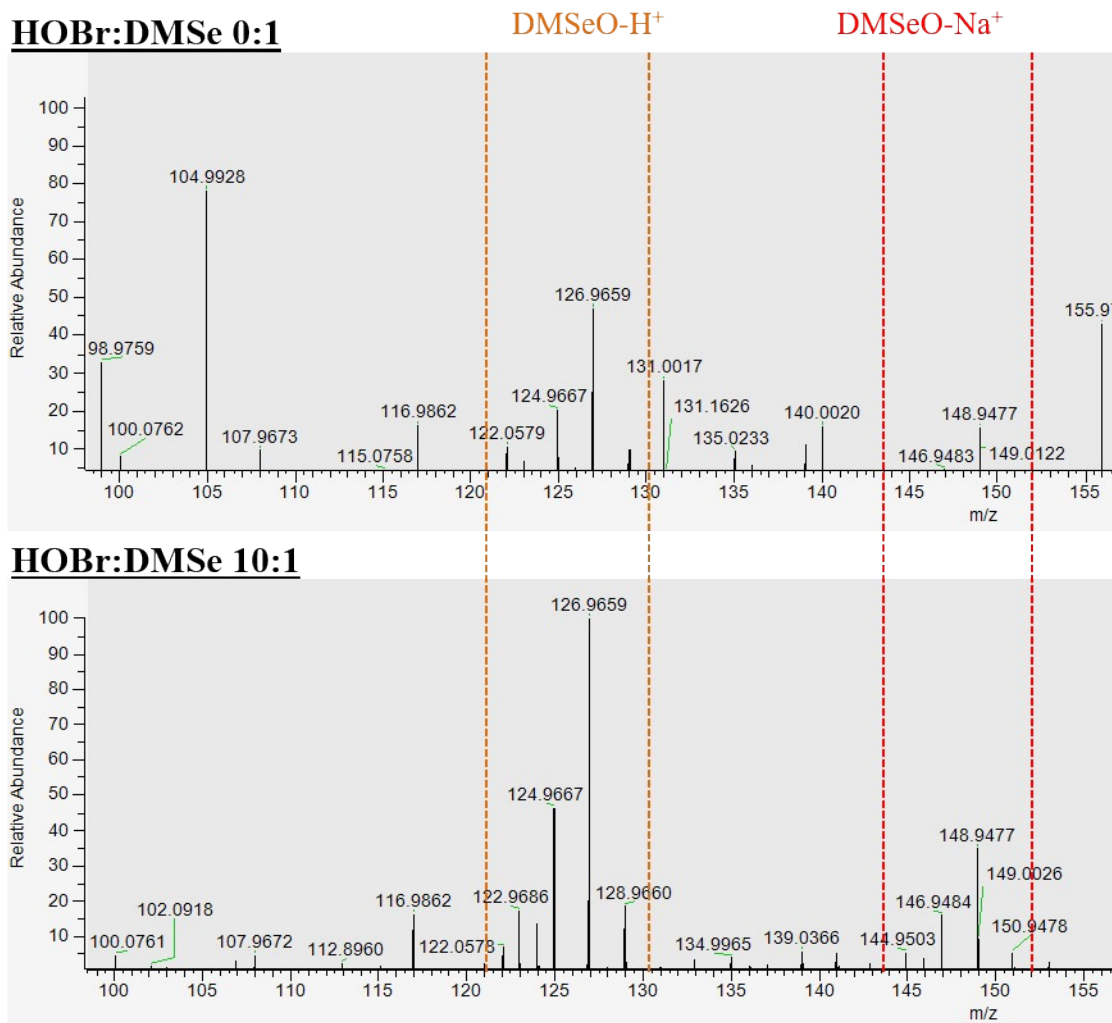

**Figure S6:** HR-MS mass spectra (between  $m/z$  100 and 155) for solutions after the reaction between DMSe and HOBr allowing for the identification of DMSeO as the Se-containing oxidation product (detected with Na<sup>+</sup> - $m/z$  148.9476- and H<sup>+</sup> - $m/z$  126.9658- adducts and mass accuracy between -0.7 and 1 ppm). The space between the stippled lines indicates the  $m/z$  area of the Se isotopic pattern (excluding <sup>74</sup>Se which is of low abundance) for the identified compounds. Experimental conditions: pH 8, [NaHCO<sub>3</sub>] = 1 mM, [DMSe] = 6.25 μM, [HOBr] = 0 – 62.5 μM.

408

409

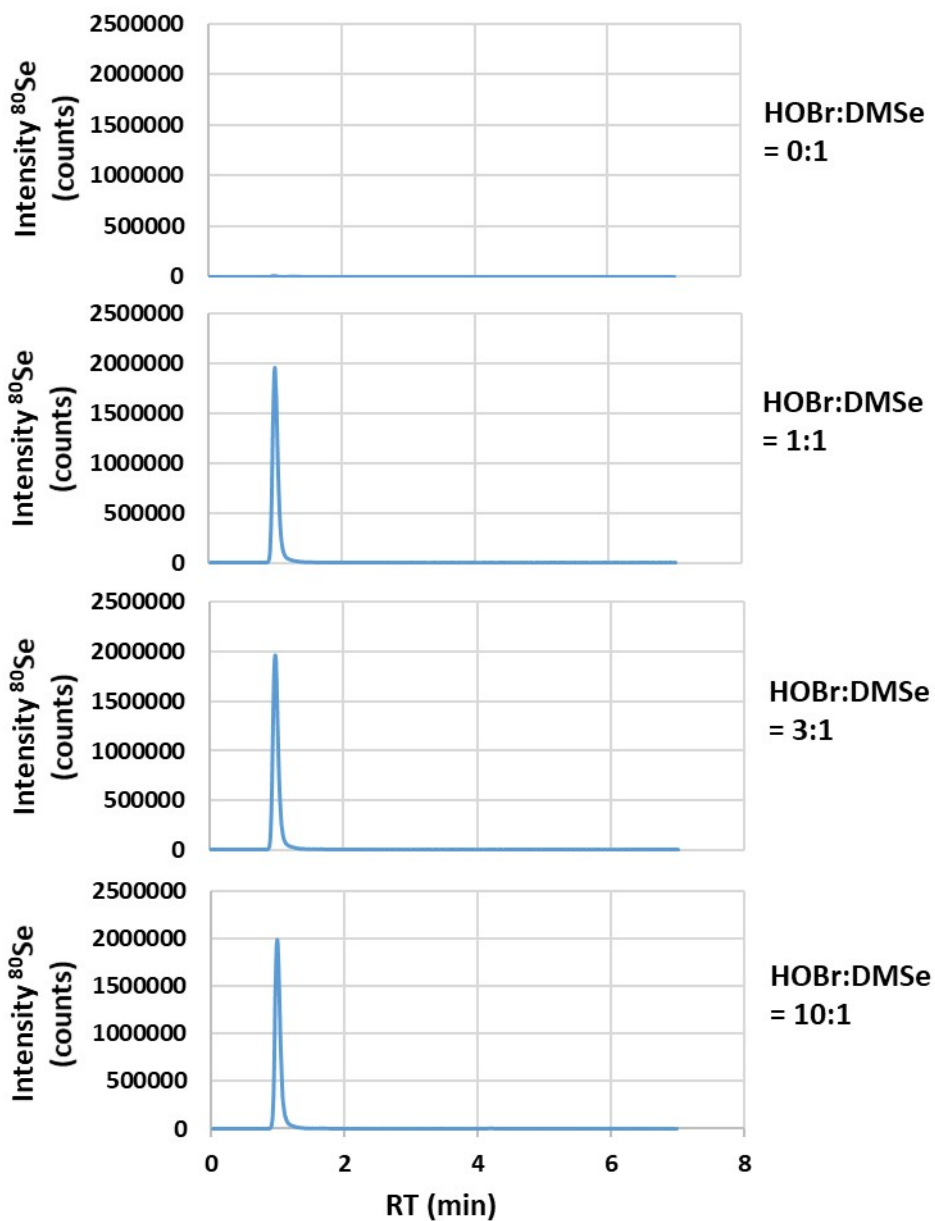

410

411 **Figure S7:** LC-ICP-MS/MS chromatograms indicating <sup>80</sup>Se counts for solutions obtained after the  
 412 reaction between DMSe and HOBBr. Only one Se peak is detected at molar HOBBr:DMSe ratios between  
 413 1:1 and 10:1. Neither Se(IV) nor Se(VI) were detected.

414

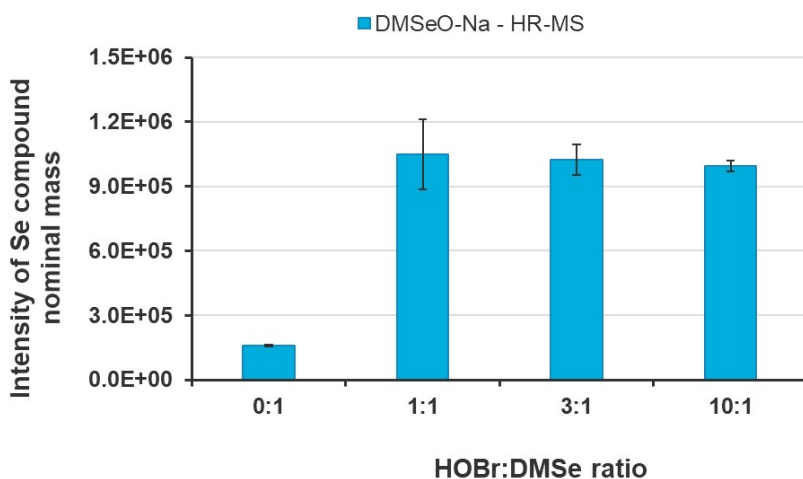

415

416 **Figure S8:** Semi-quantitative HR-MS data for the product of the reaction between DMSe and HOBr,  
 417 i.e., DMSeO. The intensity of DMSeO remains constant between molar HOBr:DMSe ratios of 1:1 to  
 418 10:1, indicating that DMSeO is not further oxidized by HOBr. Experimental conditions: pH 8,  
 419  $[\text{NaHCO}_3] = 1 \text{ mM}$ ,  $[\text{DMSe}] = 6.25 \text{ }\mu\text{M}$  ( $= 500 \text{ }\mu\text{g/L Se}$ ),  $[\text{HOBr}] = 0 - 62.5 \text{ }\mu\text{M}$ . The 0:1 ratio represents  
 420 a blank experiment of DMSe, i.e. no addition of HOBr.

421

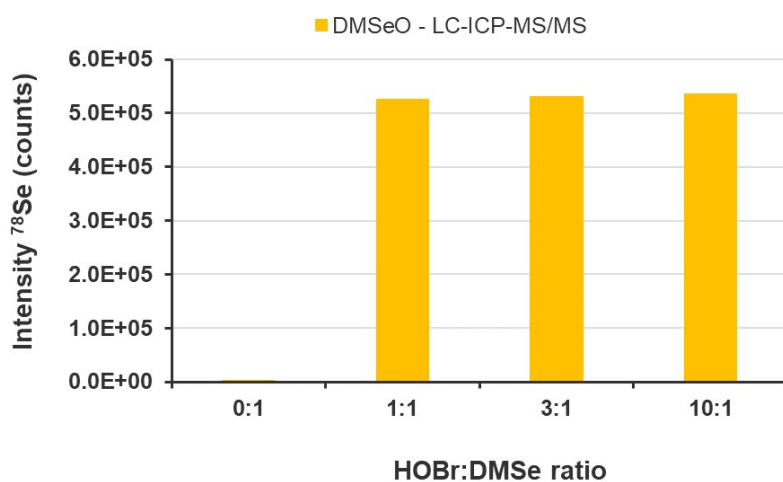

422

423 **Figure S9:** Semi-quantitative LC-ICP-MS/MS data for DMSeO, confirming the HR-MS data in Figure S8.  
 424 It should be noted that the intensities obtained by HR-MS (Figure S8) and LC-ICP-MS/MS are not  
 425 directly comparable (as these are two different instruments). Experimental conditions: pH 8,  $[\text{NaHCO}_3]$   
 426  $= 1 \text{ mM}$ ,  $[\text{DMSe}] = 6.25 \text{ }\mu\text{M}$  ( $= 500 \text{ }\mu\text{g/L Se}$ ),  $[\text{HOBr}] = 0 - 62.5 \text{ }\mu\text{M}$ .

427

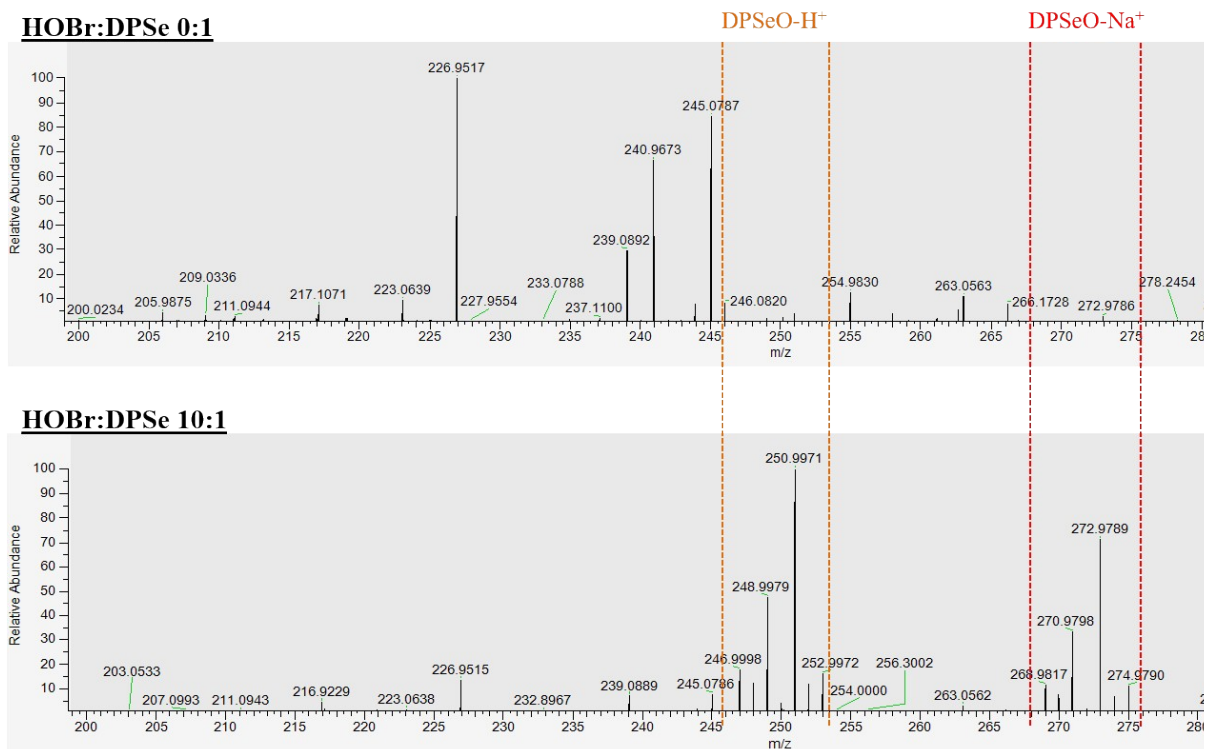

**Figure S10:** HR-MS mass spectra (between  $m/z$  200 and 280) for solutions after the reaction between DPSe and HOBr (two molar ratios) allowing for the identification of DPSeO as the Se-containing oxidation product (detected with Na<sup>+</sup> - $m/z$  272.9788- and H<sup>+</sup> - $m/z$  250.9970- adducts and mass accuracy between -0.4 and 0.1 ppm). The space between the stippled lines indicates the  $m/z$  area of the Se isotopic pattern (excluding <sup>74</sup>Se, which is of low abundance) for the identified compounds. Experimental conditions: pH 8, [NaHCO<sub>3</sub>] = 1 mM, [DPSe] = 6.25 μM, [HOBr] = 0 – 62.5 μM.



**HOBr:*N*-acetylated-  
SeMet 0:1**

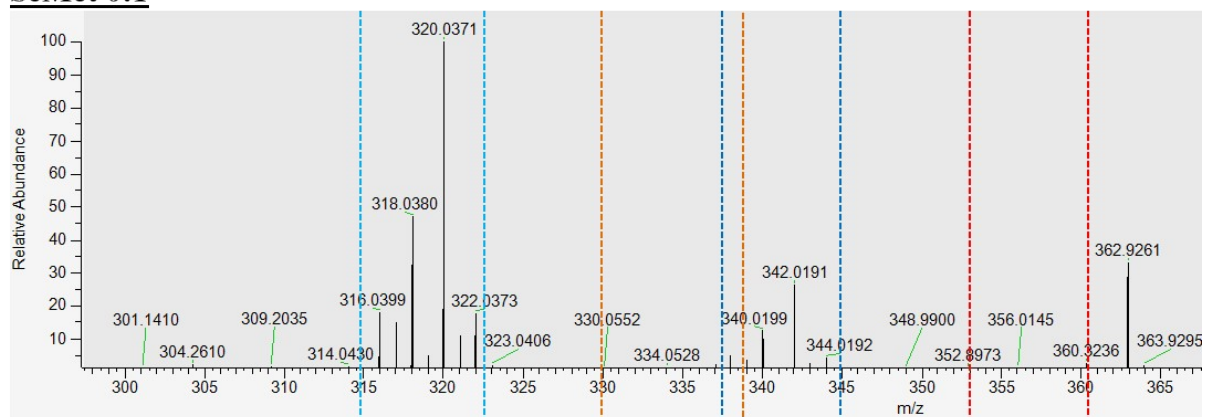

**HOBr:*N*-acetylated-  
SeMet 10:1**

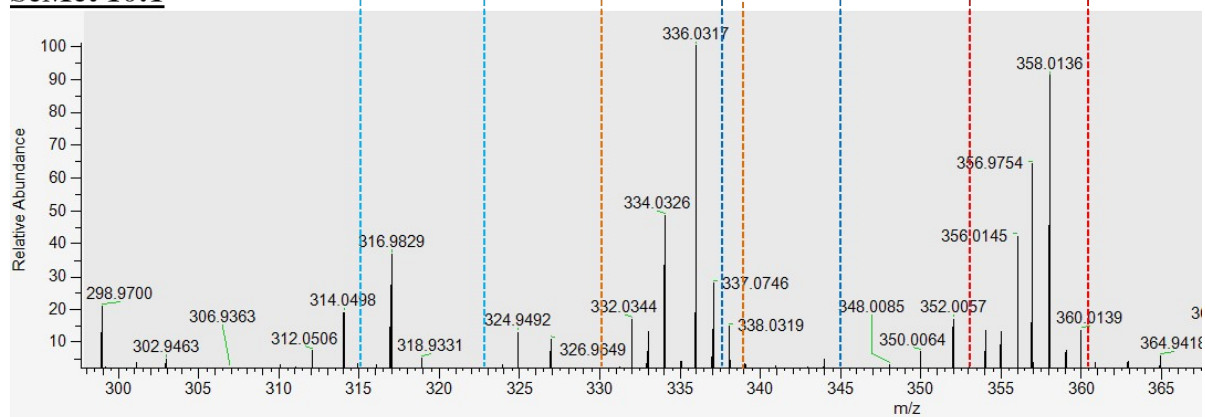

429

**Figure S11:** HR-MS mass spectra (between  $m/z$  300 and 365) for solutions after the reaction of *N*-acetylated-SeMet and HOBr (two molar ratios) allowing for the identification of *N*-acetylated-SeMetO as the Se-containing oxidation product (detected with  $Na^+$  - $m/z$  336.0318 - and  $2Na^+H^+$  - $m/z$  358.0137- adducts and mass accuracy between -0.9 and -0.8 ppm). *N*-acetylated-SeMet was detected with  $Na^+$  - $m/z$  320.0372 - and  $2Na^+H^+$  - $m/z$  342.0191- adducts and mass accuracy between -0.5 and -0.3 ppm). The space between the stippled lines indicates the  $m/z$  area of the Se isotopic pattern (excluding  $^{74}Se$ , which is of low abundance) for the identified compounds. Experimental conditions: pH 8,  $[NaHCO_3] = 1$  mM,  $[N\text{-acetylated-SeMet}] = 6.25$   $\mu$ M,  $[HOBr] = 0 - 62.5$   $\mu$ M.

430

431

### HOBr:DMDSe 0:1

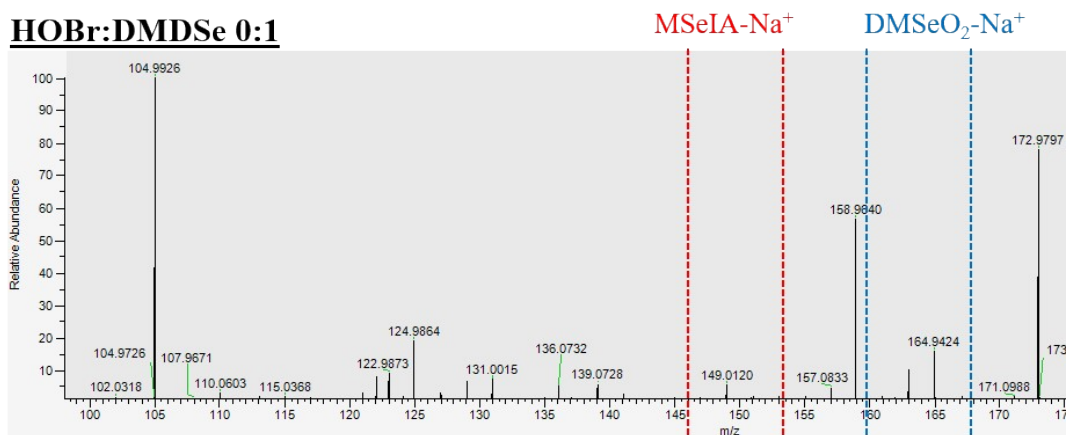

### HOBr:DMDSe 1:1

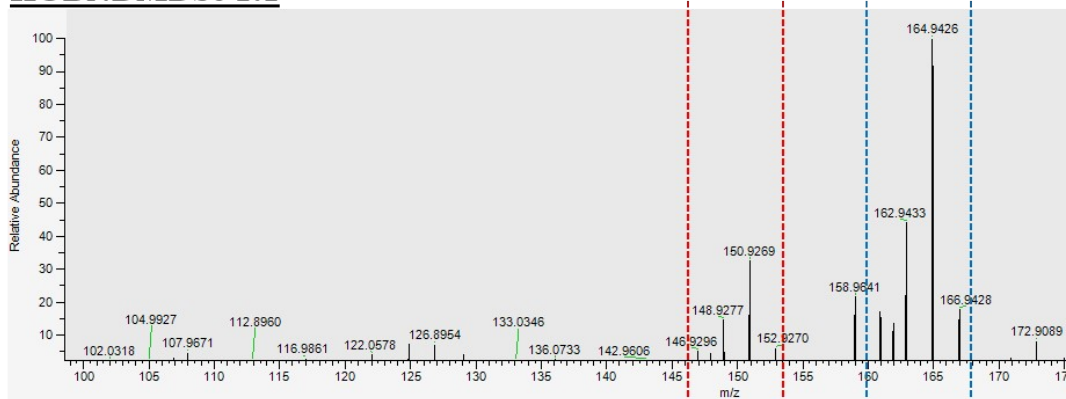

### HOBr:DMDSe 10:1

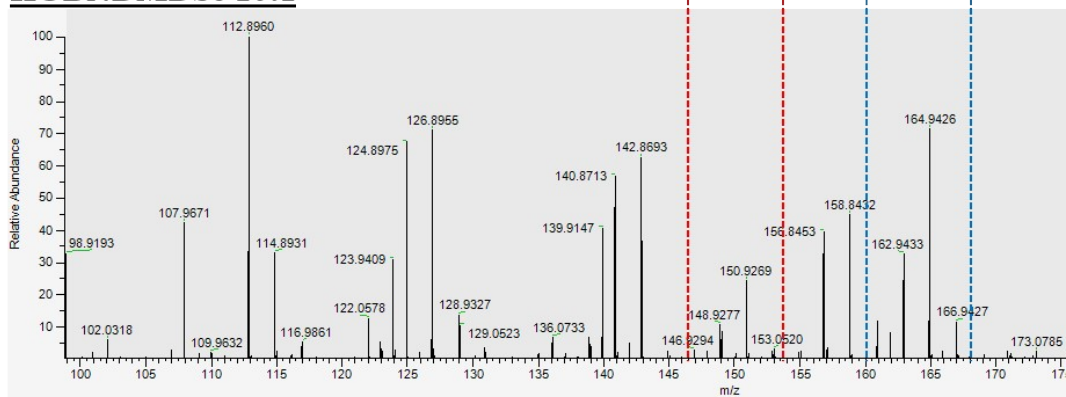

432

433 **Figure S12:** HR-MS mass spectra (between  $m/z$  100 and 170) for solutions after the reaction between  
434 DMDSe and HOBr (two molar ratios) allowing for the identification of methane seleninic acid (MSeIA)  
435 as one Se-containing oxidation product (detected with  $\text{Na}^+$  adduct - $m/z$  150.9268- and mass accuracy  
436 between -1 and 0.5 ppm). The space between the stippled lines indicates the  $m/z$  area of the Se  
437 isotopic pattern (excluding  $^{74}\text{Se}$ , which is of low abundance) for the identified compounds.  
438 Experimental conditions: pH 8,  $[\text{NaHCO}_3] = 1 \text{ mM}$ ,  $[\text{DMDSe}] = 6.25 \text{ }\mu\text{M}$ ,  $[\text{HOBr}] = 0 - 62.5 \text{ }\mu\text{M}$ . Besides  
439 MSeIA,  $\text{DMSeO}_2$  was also detected by HR-MS ( $\text{Na}^+$  adduct -  $m/z$  164.9425- and mass accuracy between  
440 -0.9 and -0.4 ppm).

441

442

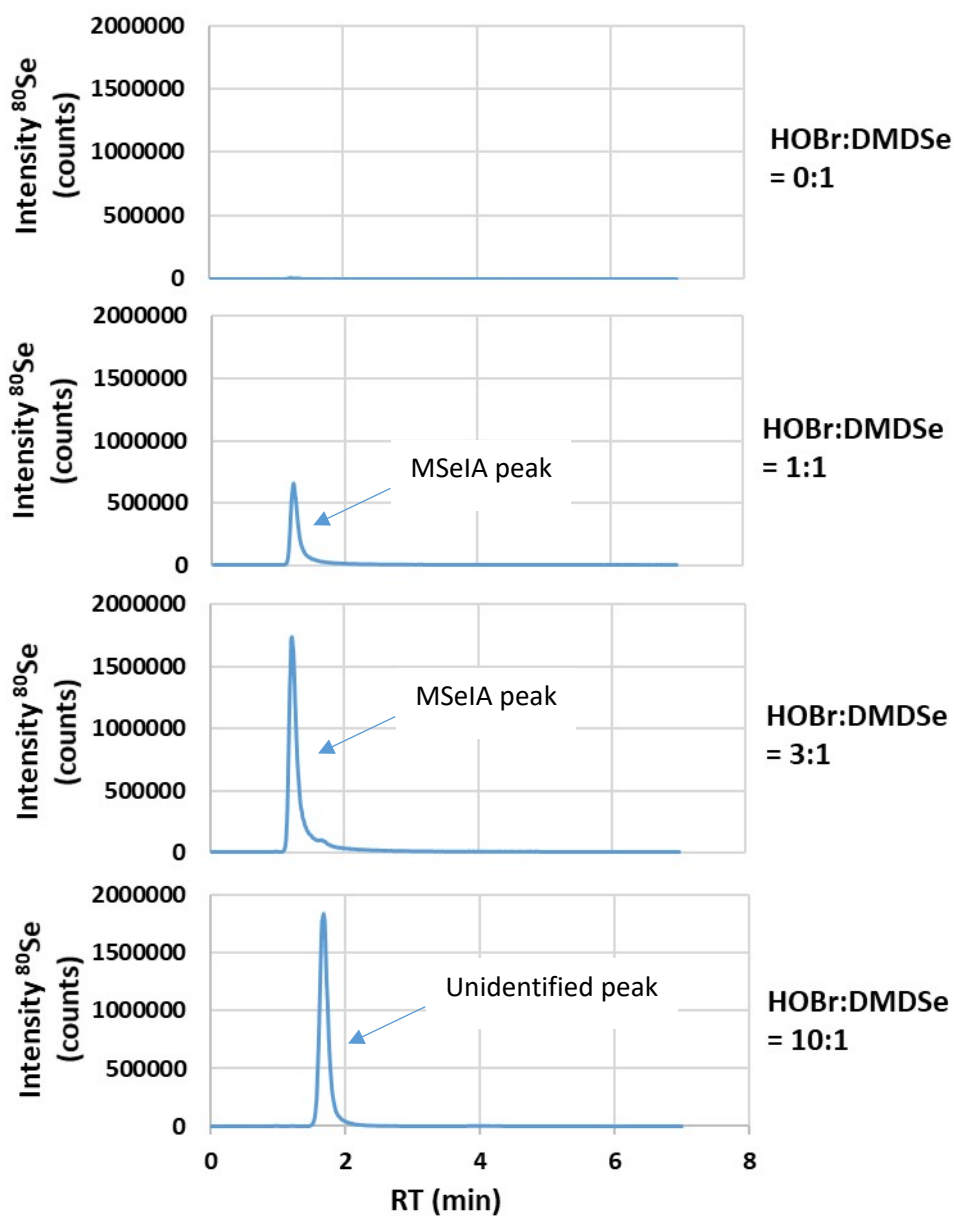

443

444 **Figure S13:** LC-ICP-MS/MS chromatograms obtained for solutions after the reaction between DMDSe  
 445 and HOBBr (four molar ratios), which (i) confirm the formation of MSeIA (identified using a MSeIA  
 446 standard) observed with HR-MS at molar HOBBr:DMDSe ratios of 1:1 and 3:1; and (ii) show the reaction  
 447 of MSeIA with HOBBr and the formation of another Se compound that could not be identified with HR-  
 448 MS. Neither Se(IV) nor Se(VI) were detected under any tested reaction conditions.

449

450

451

452

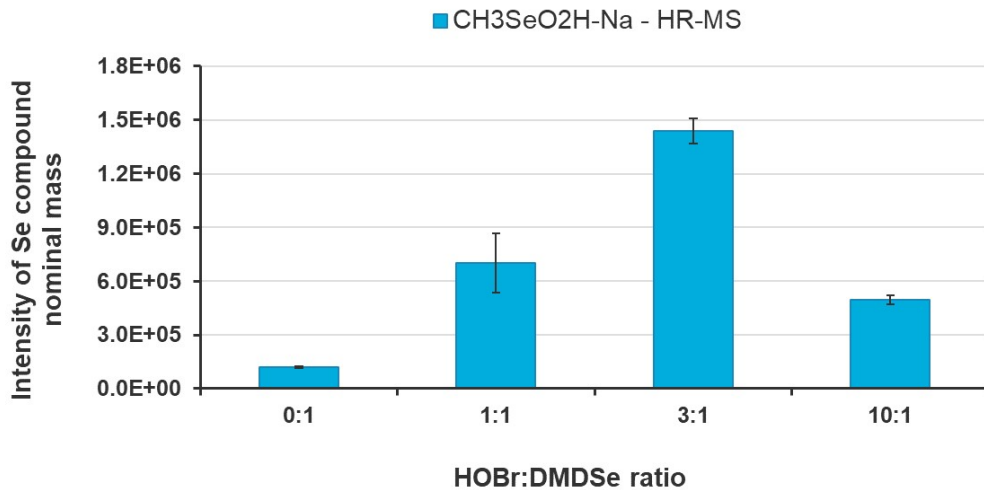

453

454 **Figure S14:** Semi-quantitative HR-MS data for the reaction between DMDSe and HOBr (four molar  
 455 ratios; 0:1 blank), showing that the highest yield of MSeIA ( $\text{CH}_3\text{SeO}_2\text{H}$ ) occurred at the HOB: DMDSe =  
 456 3:1 ratio. Experimental conditions: pH 8,  $[\text{NaHCO}_3] = 1 \text{ mM}$ ,  $[\text{DMDSe}] = 6.25 \text{ }\mu\text{M}$  (= 1000  $\mu\text{g/L}$  Se),  
 457  $[\text{HOBr}] = 0 - 62.5 \text{ }\mu\text{M}$ .

458

459

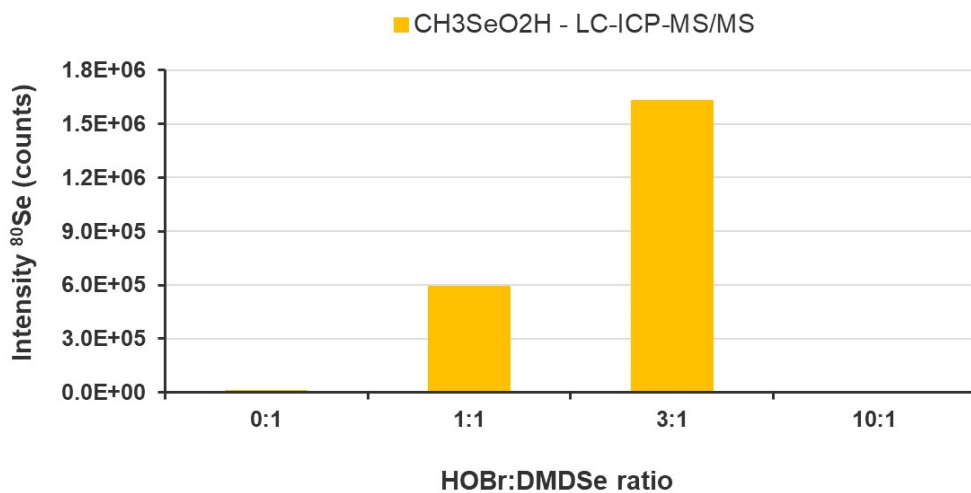

460

461 **Figure S15:** Semi-quantitative LC-ICP-MS/MS data for the reaction between DMDSe and HOBr (four  
 462 molar ratios; 0:1 blank), showing that the highest yield of MSeIA ( $\text{CH}_3\text{SeO}_2\text{H}$ ) occurred at the  
 463 HOB: DMDSe = 3:1 ratio. Note that the intensities obtained by HR-MS and LC-ICP-MS/MS are not  
 464 comparable (as these are two different instruments). Experimental conditions: pH 8,  $[\text{NaHCO}_3] = 1 \text{ mM}$ ,  
 465  $[\text{DMDSe}] = 6.25 \text{ }\mu\text{M}$  (= 1000  $\mu\text{g/L}$  Se),  $[\text{HOBr}] = 0 - 62.5 \text{ }\mu\text{M}$ .

466

467

468

469

470

471

472

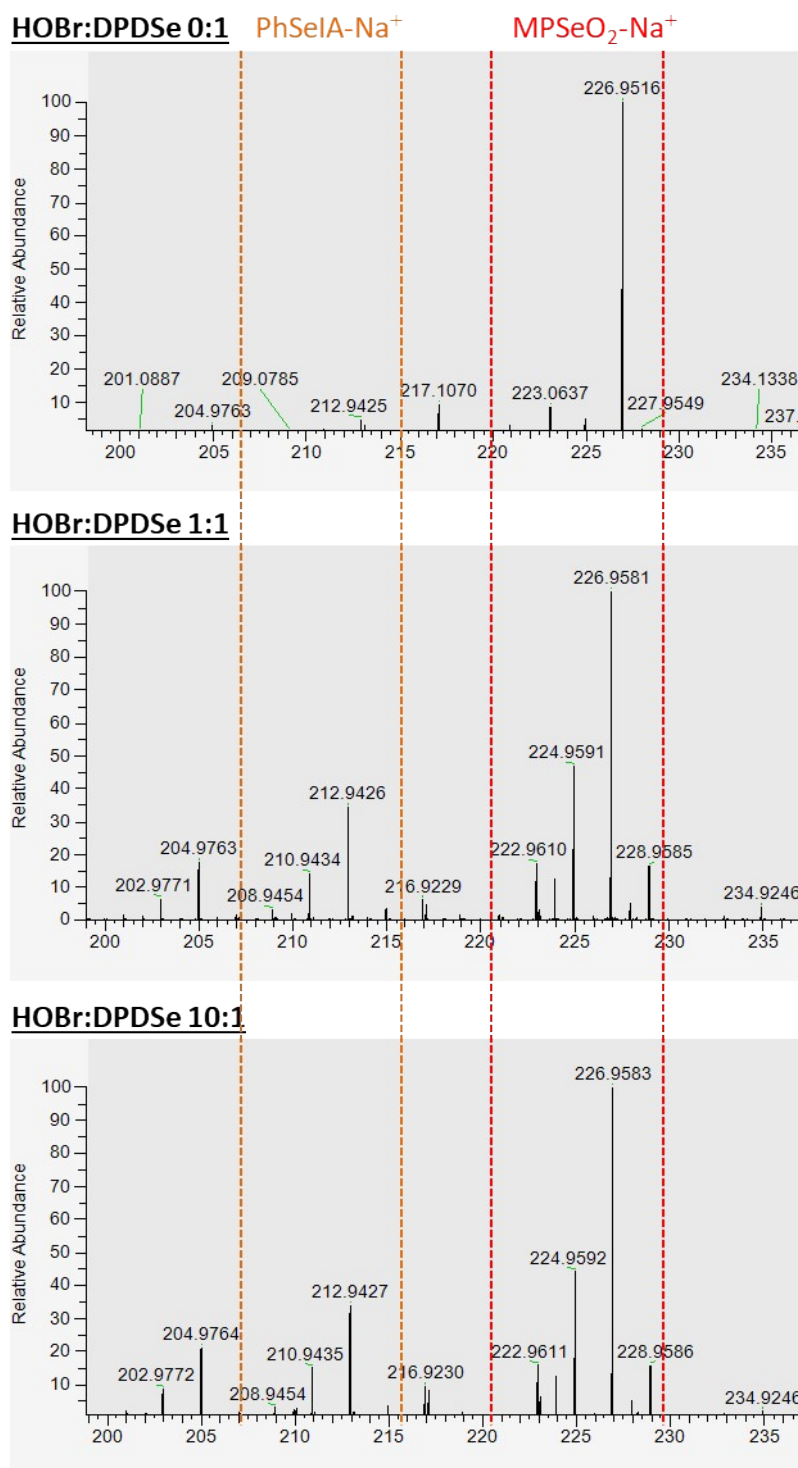

**Figure S16:** HR-MS mass spectra for solutions after the reaction between DPDSe and HOBr (two molar ratios) allowing for the identification of phenyl seleninic acid (PhSeIA, C<sub>6</sub>H<sub>5</sub>SeO<sub>2</sub>H, detected with Na<sup>+</sup> - *m/z* 212.9424- adducts and mass accuracy between -0.6 and 0.8 ppm) and methyl phenyl selenone (MPSeO<sub>2</sub>, C<sub>7</sub>H<sub>7</sub>SeO<sub>2</sub>, detected with Na<sup>+</sup> - *m/z* 226.9582- adducts and mass accuracy between -0.3 and 0.6 ppm) as two Se-containing oxidation products. Experimental conditions: pH 8, [NaHCO<sub>3</sub>] = 1 mM, [DPDSe] = 6.25 μM, [HOBr] = 0 – 62.5 μM.

**HOBr:*N*-acetylated-SeCys<sub>2</sub> 0:1**

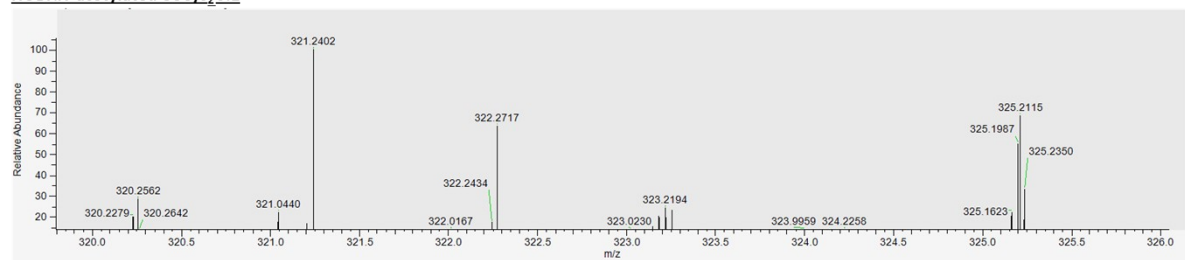

**HOBr:*N*-acetylated-SeCys<sub>2</sub> 1:1**

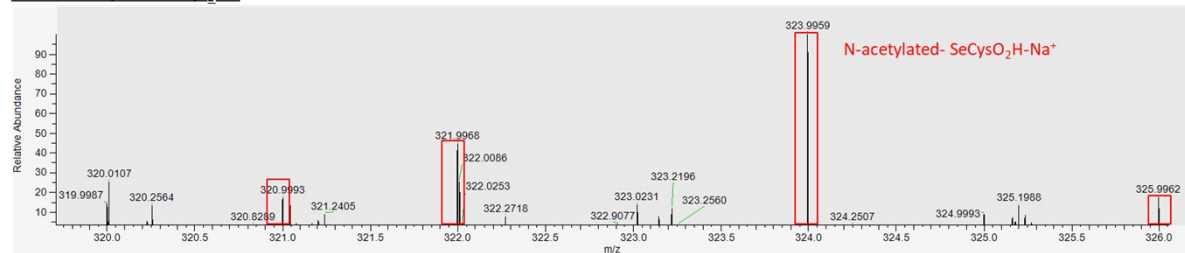

**HOBr:*N*-acetylated-SeCys<sub>2</sub> 10:1**

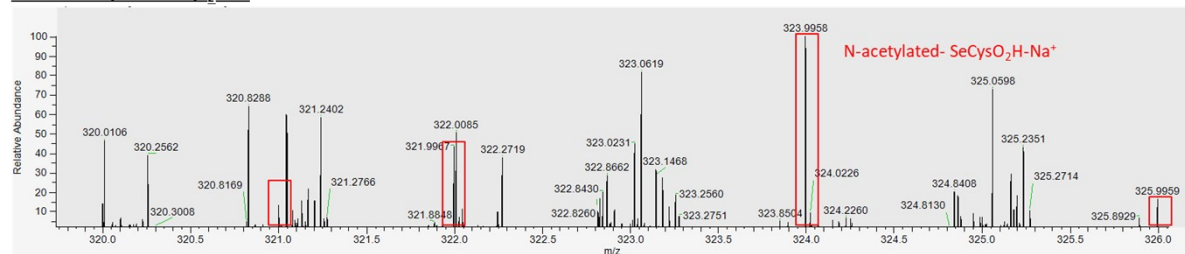

**Figure S17:** HR-MS mass spectra for solutions after the reaction between *N*-acetylated-SeCys<sub>2</sub> and HOBr (three molar ratios) allowing for the identification of *N*-acetylated-SeCysO<sub>2</sub>H (detected with Na<sup>+</sup> - *m/z* 323.9956- and 2Na<sup>+</sup>-H<sup>+</sup> -*m/z* 345.9776- adducts and mass accuracy between -0.2 and 1 ppm) as a Se-containing oxidation product (only the MS spectra of the Na<sup>+</sup> adduct of *N*-acetylated-SeCysO<sub>2</sub>H -*m/z* 323.9956- is shown). *N*-acetylated-SeCys<sub>2</sub> was detected with Na<sup>+</sup> -*m/z* 559.0068 - and 2Na<sup>+</sup>-H<sup>+</sup> -*m/z* 580.9888- adducts and mass accuracy between 0.6 and 1.4 ppm). Experimental conditions: pH 8, [NaHCO<sub>3</sub>] = 1 mM, [*N*-acetylated-SeCys<sub>2</sub>] = 6.25 μM, [HOBr] = 0 – 62.5 μM

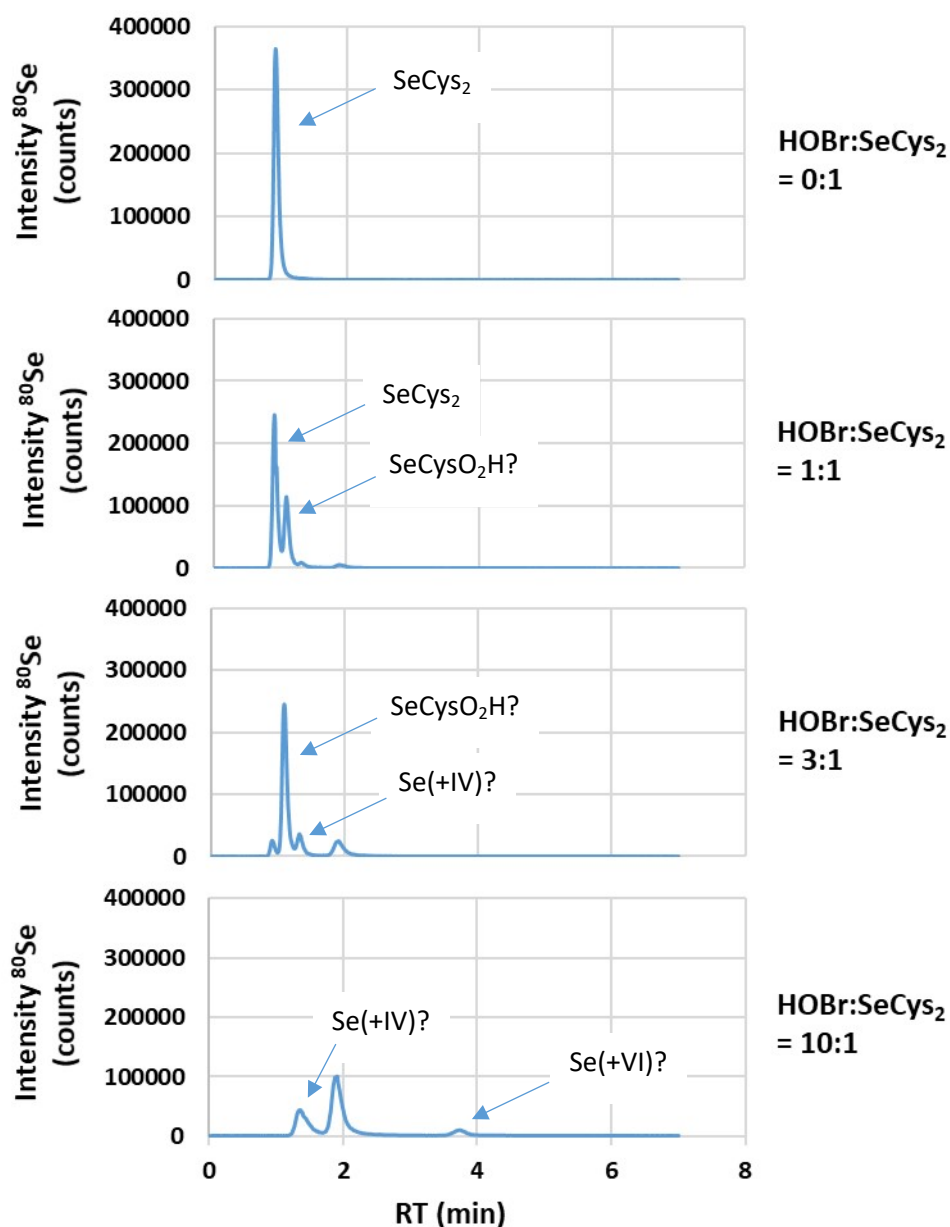

477

478 **Figure S18:** LC-ICP-MS/MS chromatograms indicating  $^{80}\text{Se}$  counts for solutions obtained after the  
 479 reaction between *N*-acetylated- $\text{SeCys}_2$  (in the figure displayed as  $\text{SeCys}_2$ ) and  $\text{HOBr}$  for four molar  
 480 ratios.  $\text{SeCys}_2$  elutes at 0.913 min. The first oxidation product appears at a RT of 1.1 min ( $\text{HOBr}:\text{SeCys}_2$   
 481 ratio of 1:1), which becomes predominant at a molar  $\text{HOBr}:\text{SeCys}_2$  ratio of 3:1. At a molar  $\text{HOBr}:\text{SeCys}_2$   
 482 ratio of 3:1, there is only a small residual concentration of  $\text{SeCys}_2$  and 2 other minor oxidation products  
 483 are visible, i.e., at RT = 1.36 min, which is potentially  $\text{Se}(+\text{IV})$ , and at RT = 1.9 min. At the  $\text{HOBr}:\text{SeCys}_2$   
 484 = 10:1 ratio, the main oxidation product appears at RT = 1.9 min followed by the one at RT = 1.36 min.  
 485 Furthermore, a third product appears at RT = 3.8 min (potentially  $\text{Se}(+\text{VI})$ ).

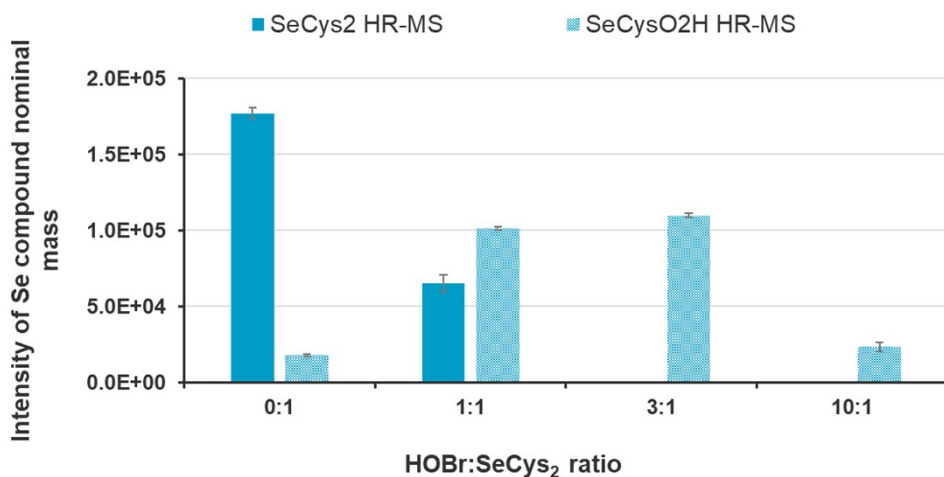

486

487 **Figure S19:** Semi-quantitative HR-MS data for the product of the reaction between *N*-acetylated-  
 488 SeCys<sub>2</sub> (in the figure displayed as SeCys<sub>2</sub>) and HOBr (four molar ratios; 0:1 blank), showing that the  
 489 intensity of SeCys<sub>2</sub> decreased from the molar HOB:SeCys<sub>2</sub> ratio of 0:1 to 3:1 to zero. HR-MS data show  
 490 that SeCys<sub>2</sub> is transformed to Selenocysteine-seleninic-acid (SeCysO<sub>2</sub>H) at molar HOB:SeCys<sub>2</sub> ratios of  
 491 1:1 and 3:1, which is further oxidized at a molar HOB:SeCys<sub>2</sub> ratio of 10:1. Experimental conditions:  
 492 pH 8, [NaHCO<sub>3</sub>] = 1 mM, [*N*-acetylated-SeCys<sub>2</sub>] = 6.25 μM (= 1000 μg/L Se), [HOBr] = 0 – 62.5 μM.

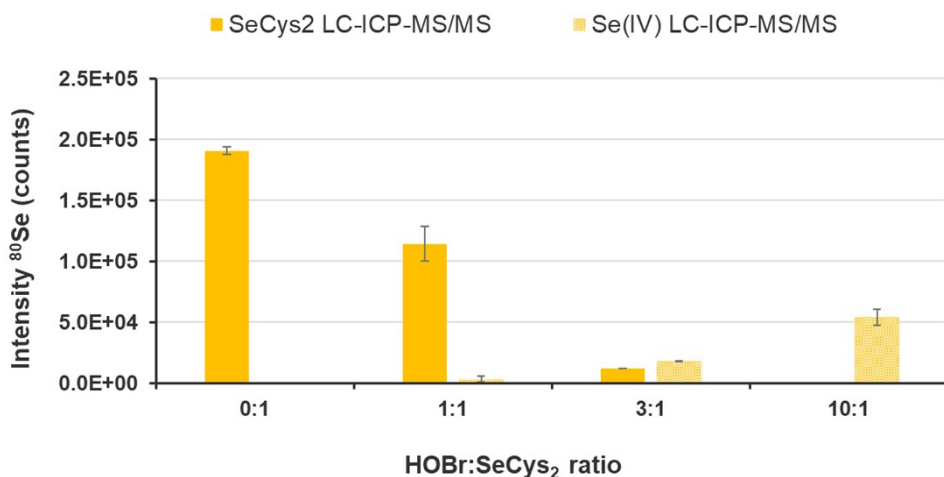

493

494 **Figure S20:** Semi-quantitative LC-ICP-MS/MS data for the reaction between *N*-acetylated-SeCys<sub>2</sub> (in  
 495 the figure displayed as SeCys<sub>2</sub>) and HOBr (four molar ratios; 0:1 blank), showing that the intensity of  
 496 SeCys<sub>2</sub> decreased from the molar HOB:SeCys<sub>2</sub> ratio of 0:1 to 3:1 to almost zero. LC-ICP-MS/MS data  
 497 suggests that SeCysO<sub>2</sub>H is transformed to Se(+IV) or Se(+VI), since the intensity for Se(+IV) is highest  
 498 for the molar HOB:SeCys<sub>2</sub> ratio of 10:1 and a new peak appeared in the associated LC-ICP-MS/MS  
 499 chromatogram provided in Figure S18 (at RT = 3.8 min), which is potentially Se(+VI). Experimental  
 500 conditions: pH 8, [NaHCO<sub>3</sub>] = 1 mM, [*N*-acetylated-SeCys<sub>2</sub>] = 6.25 μM (= 1000 μg/L Se), [HOBr] = 0 –  
 501 62.5 μM.



502 **Text S9: Experiments investigating the higher reactivity of DMSe with HOBr in buffered artificial**  
503 **seawater medium compared to buffered ultrapure water**

504 A separate kinetic experiment for the DMSe-HOBr reaction in buffered artificial seawater in absence  
505 of Br<sup>-</sup> (i.e. [PO<sub>4</sub>]<sub>tot</sub> = 20 mM, [NaCl] = 0.55 M) resulted in a substantially lower DMSe-HOBr reactivity  
506 ( $k_{\text{DMSe+HOBr}} = 1.3 \times 10^8 \text{ M}^{-1} \text{ s}^{-1}$ ) in comparison to the buffered artificial seawater in presence of Br<sup>-</sup> ( $k =$   
507  $4.7 \pm 0.5 \times 10^8$ ) but still higher than in the sample with buffered ultrapure water. In another experiment,  
508 the same ionic strength was applied with perchlorate ([PO<sub>4</sub>]<sub>tot</sub> = 20 mM, [NaClO<sub>4</sub>] = 0.55 M), which  
509 yielded a similar reactivity compared to the Br<sup>-</sup> free seawater medium ( $k_{\text{DMSe+HOBr}} = (2.2 \pm 0.7) \times 10^8 \text{ M}^{-1}$   
510  $\text{s}^{-1}$ ) (Table S6, Figure S5). The higher slope values (Figure S5) obtained for higher ionic strength are not  
511 caused by slower HOBr-resorcinol kinetics under a higher ionic strength. A possible change of pK<sub>a</sub>  
512 towards lower values would shift resorcinol speciation towards the more reactive deprotonated  
513 species and HOBr to the less reactive OBr<sup>-</sup> (Table S4). Based on this, it can be concluded that a higher  
514 ionic strength contributes to a higher DMSe-HOBr reactivity. However, it is also evident that Br<sup>-</sup>  
515 contributes to a higher reactivity of the DMSe-HOBr reaction, since the reactivity in a Br<sup>-</sup>-containing  
516 artificial seawater medium ( $k_{\text{DMSe+HOBr}} = (5.4 \pm 0.6) \times 10^8 \text{ M}^{-1} \text{ s}^{-1}$ ) is significantly different to the reactivity  
517 in a Br<sup>-</sup>-free seawater medium ( $k_{\text{DMSe+HOBr}} = 1.5 \times 10^8 \text{ M}^{-1} \text{ s}^{-1}$ ) or in a perchlorate medium ( $k_{\text{DMSe+HOBr}} =$   
518  $(2.2 \pm 0.7) \times 10^8 \text{ M}^{-1} \text{ s}^{-1}$ ). We do not have a reasonable explanation for how Br<sup>-</sup> enhances the reactivity.  
519 An indirect effect of Br<sup>-</sup> via the formation of other reactive bromine species (e.g. Br<sub>2</sub>, via the reaction  
520 between Br<sup>-</sup> and HOBr) is not expected to be the reason for the higher observed reactivity of DMSe in  
521 buffered artificial seawater medium. Concentrations of reactive bromine species can be calculated  
522 based on concentrations of halides (i.e. Br<sup>-</sup>, Cl<sup>-</sup>), HOBr and H<sup>+</sup> used in kinetic experiments (Table S7),  
523 and equations S9 - S11.

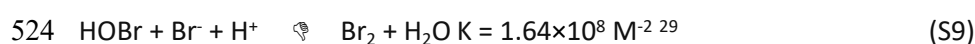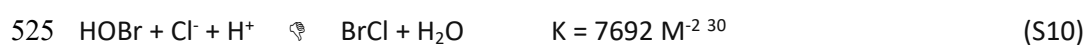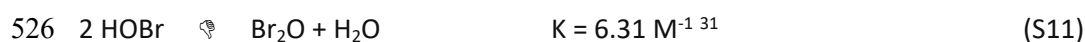

527 Normalization of calculated concentrations of Br<sub>2</sub>, BrCl and Br<sub>2</sub>O to HOBr concentrations results in their  
 528 respective mole fractions (Table S8).

529 Calculated Br<sub>2</sub> concentrations (based on equation S9) account for only 0.14% of HOBr (Table S8), which  
 530 could increase the observed reactivity in artificial seawater medium compared to the phosphate-  
 531 buffered medium by 40% at most, considering an upper reactivity limit of  $\approx 2 \times 10^{10} \text{ M}^{-1} \text{ s}^{-1}$  for second-  
 532 order reactions (diffusion limit). This cannot explain the 6.5-fold higher reactivity of DMSe in buffered  
 533 artificial seawater medium than phosphate-buffered medium.

534 **Table S7:** Concentrations of halides, HOBr and H<sup>+</sup> in DMSe-HOBr experiments performed in buffered  
 535 artificial seawater.

| Compound                    | Concentration in experiment [M] | Remark                                                                                                                            |
|-----------------------------|---------------------------------|-----------------------------------------------------------------------------------------------------------------------------------|
| Chloride (Cl <sup>-</sup> ) | 0.55                            |                                                                                                                                   |
| Bromide (Br <sup>-</sup> )  | $\geq 8.4 \times 10^{-4}$       | Bromide from KBr and HOBr stock solution. $[\text{Br}_{\text{tot}}^-] = 8.4 \times 10^{-6} \text{ M} + 1.34 \times [\text{HOBr}]$ |
| HOBr                        | 0 - $1.5 \times 10^{-6}$        |                                                                                                                                   |
| H <sup>+</sup>              | $1 \times 10^{-8}$              |                                                                                                                                   |

536

537 **Table S8:** Concentrations and mole fractions of BrCl, Br<sub>2</sub>O and Br<sub>2</sub> for used HOBr concentrations in  
 538 buffered artificial seawater medium according to Table S7 at pH 8.

|             | BrCl                  |                                         | Br <sub>2</sub> O      |                                         | Br <sub>2</sub>       |                                         |
|-------------|-----------------------|-----------------------------------------|------------------------|-----------------------------------------|-----------------------|-----------------------------------------|
|             | [M]                   | % of total bromine                      | [M]                    | % of total bromine                      | [M]                   | % of total bromine                      |
| HOBr 0 μM   | 0                     |                                         | 0                      |                                         | 0                     |                                         |
| HOBr 5 μM   | $2.1 \times 10^{-10}$ | <b><math>4.23 \times 10^{-3}</math></b> | $1.58 \times 10^{-10}$ | <b><math>3.16 \times 10^{-3}</math></b> | $6.94 \times 10^{-9}$ | <b><math>1.39 \times 10^{-1}</math></b> |
| HOBr 10 μM  | $4.2 \times 10^{-10}$ | <b><math>4.23 \times 10^{-3}</math></b> | $6.31 \times 10^{-10}$ | <b><math>6.31 \times 10^{-3}</math></b> | $1.40 \times 10^{-8}$ | <b><math>1.40 \times 10^{-1}</math></b> |
| HOBr 15 μM  | $6.3 \times 10^{-10}$ | <b><math>4.23 \times 10^{-3}</math></b> | $1.42 \times 10^{-9}$  | <b><math>9.47 \times 10^{-3}</math></b> | $2.12 \times 10^{-8}$ | <b><math>1.41 \times 10^{-1}</math></b> |
| HOBr 125 μM | $5.3 \times 10^{-9}$  | <b><math>4.23 \times 10^{-3}</math></b> | $9.86 \times 10^{-8}$  | <b><math>7.89 \times 10^{-2}</math></b> | $2.07 \times 10^{-7}$ | <b><math>1.65 \times 10^{-1}</math></b> |

539

540

541

542

543

544 **Text S10: Kinetics of the HOBr-BOC<sub>2</sub>O reaction**

545 A decrease of HOBr concentration was observed when it was exposed to BOC<sub>2</sub>O. To assess the  
546 importance of the HOBr-BOC<sub>2</sub>O reaction, kinetic experiments under pseudo first-order conditions in  
547 excess of BOC<sub>2</sub>O were performed. BOC<sub>2</sub>O was mixed with HOBr in a molar ratio of BOC<sub>2</sub>O:HOBr = 20:1.  
548 Residual HOBr was quenched after different reaction times (60 and 360 s), by transferring 2 mL of the  
549 reaction solution to a volumetric flask, to which 3 mL of an ABTS solution (130 μM ABTS; 40 mM H<sub>2</sub>SO<sub>4</sub>)  
550 was previously added. The absorption was measured at λ = 405 nm and converted to a HOBr  
551 concentration (based on a HOBr-ABTS calibration; ε = 30226 M<sup>-1</sup> cm<sup>-1</sup>).<sup>28</sup> Figure S21 shows a plot of ln  
552 of the relative residual concentration of HOBr as a function of time. The slope of the straight line  
553 corresponds to the pseudo first-order rate constant. Division of the pseudo first-order rate constant  
554 by the BOC<sub>2</sub>O concentration results in the second-order rate constant of the HOBr-BOC<sub>2</sub>O reaction  
555 (Table S9).

556 Figure S21 (blue dotted line) shows that the rate of the HOBr decrease is initially higher, which points  
557 to an impurity that reacts faster with HOBr than BOC<sub>2</sub>O. The determined second-order rate constant  
558 for the HOBr-BOC<sub>2</sub>O reaction is 10.7 M<sup>-1</sup> s<sup>-1</sup> (blue dotted line, 0-60 s, Figure S21) and 5.0 M<sup>-1</sup> s<sup>-1</sup> (orange  
559 dotted line, 0-360 s, Figure S21). Based on this data set, it can be concluded that BOC<sub>2</sub>O is not relevant  
560 for HOBr consumption for the experimental conditions in this study with a ca. 10-fold excess relative  
561 to *N*-acetylated-Se-amino acid concentrations as the reactivity of studied *N*-acetylated-Se-amino acids  
562 towards HOBr exceeds the HOBr-BOC<sub>2</sub>O reactivity by several orders of magnitude.

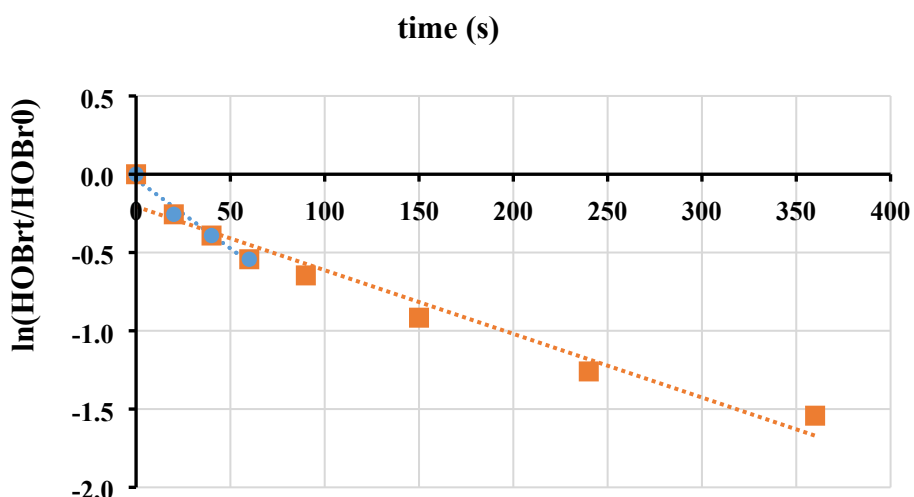

563

564 **Figure S21:** Kinetics of the HOBr- BOC<sub>2</sub>O reaction (pseudo-first order conditions, see Table S9) at pH 8.  
 565 The decrease of the ln of the relative residual concentration of HOBr is illustrated for two time periods  
 566 of the same experiment: 0-60 s (blue fit) and 0-360 s (orange fit). The experimental conditions are  
 567 indicated in Table S9.

568 **Table S9:** Experimental conditions of the HOBr-BOC<sub>2</sub>O kinetic experiment and the determined  
 569 apparent second-order rate constants at pH 8.

|                                                                                        |             |
|----------------------------------------------------------------------------------------|-------------|
| BOC <sub>2</sub> O-concentration [ $\mu$ M]                                            | 825         |
| HOBr initial [ $\mu$ M]                                                                | 41.7        |
| PO <sub>4</sub> -buffer [mM]                                                           | 20          |
| pH                                                                                     | 8.0         |
| Slope (i.e., $k'_{app, pH8 BOC_2O+HOBr}$ ) 0-60s [ $s^{-1}$ ]                          | 0.0088      |
| Slope (i.e., $k'_{app, pH8 BOC_2O+HOBr}$ ) 0-360s [ $s^{-1}$ ]                         | 0.0041      |
| Second-order rate constant ( $k''_{app, pH8 BOC_2O+HOBr}$ ) 0-60s [ $M^{-1} s^{-1}$ ]  | <b>10.7</b> |
| Second-order rate constant ( $k''_{app, pH8 BOC_2O+HOBr}$ ) 0-360s [ $M^{-1} s^{-1}$ ] | <b>5.0</b>  |

570

571 **Text S11: Stoichiometry for reactions between diselenide compounds and HOBr**

572 The stoichiometries of the HOBr-target compound reactions were determined by experiments using  
 573 an understoichiometric molar concentration of HOBr relative to the target compound concentration.

574 The consumed HOBr is plotted against the consumed target compound and shown in Figure S22. The  
 575 stoichiometry of reactions between HOBr and diselenides (DMDS<sub>e</sub>, DPDS<sub>e</sub>, *N*-acetylated-SeCys<sub>2</sub>) is  
 576 close to 3:1.

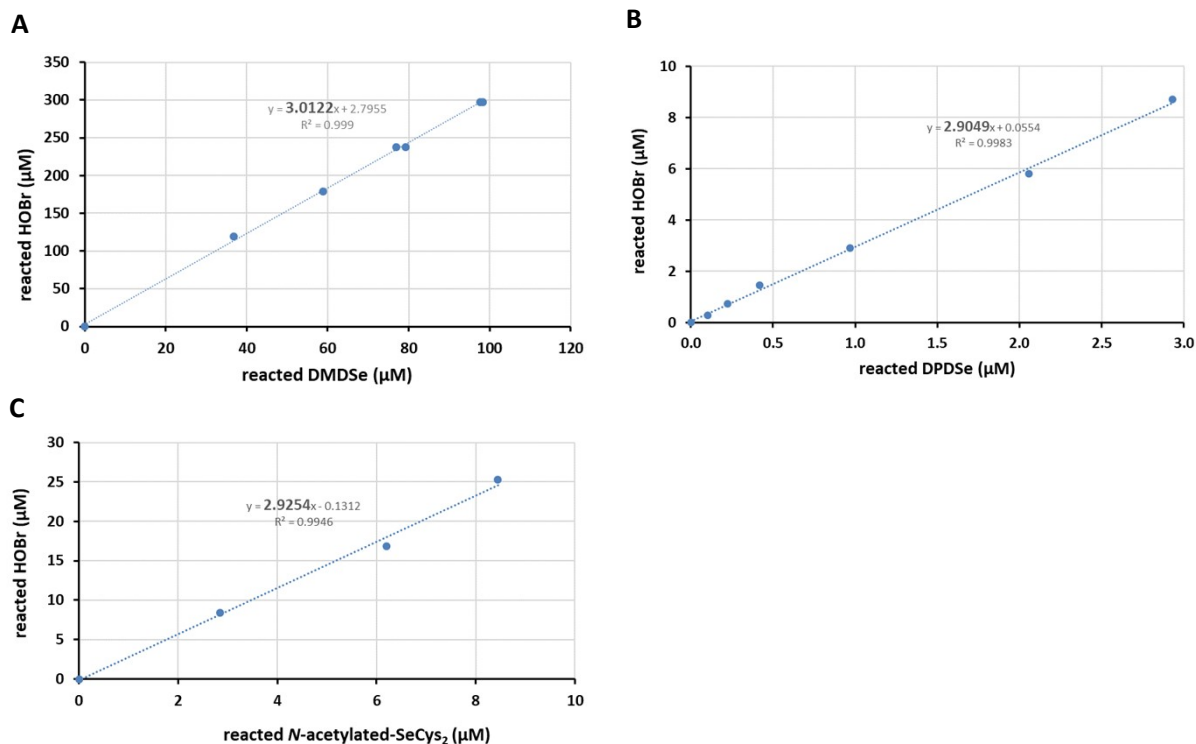

577

578 **Figure S22:** Stoichiometries of reactions between diselenides and HOBr at pH 8 ( $n=1$ ). (A) DMDSe, (B)  
579 DPDSe, (C) *N*-acetylated-SeCys<sub>2</sub>.

580 Conditions: pH 8, Buffer media:  $[\text{PO}_4]_{\text{tot}} = 20 \text{ mM}$  for experiments with DMDSe,  $[\text{PO}_4]_{\text{tot}} = 10 \text{ mM}$  for  
581 experiments with DPDSe and *N*-acetylated-SeCys<sub>2</sub>. Initial Se-compound concentrations:  $[\text{DMDSe}]_0 =$   
582  $125 \mu\text{M}$ ,  $[\text{DPDSe}]_0 = 2.93 \mu\text{M}$ ,  $[\text{N-acetylated-SeCys}_2]_0 = 8.45 \mu\text{M}$ . HOBr concentrations were varied  
583 between 0 and 2.5 times the DMDSe concentration (3 times excess used for DPDSe and *N*-acetylated-  
584 SeCys<sub>2</sub>).

585

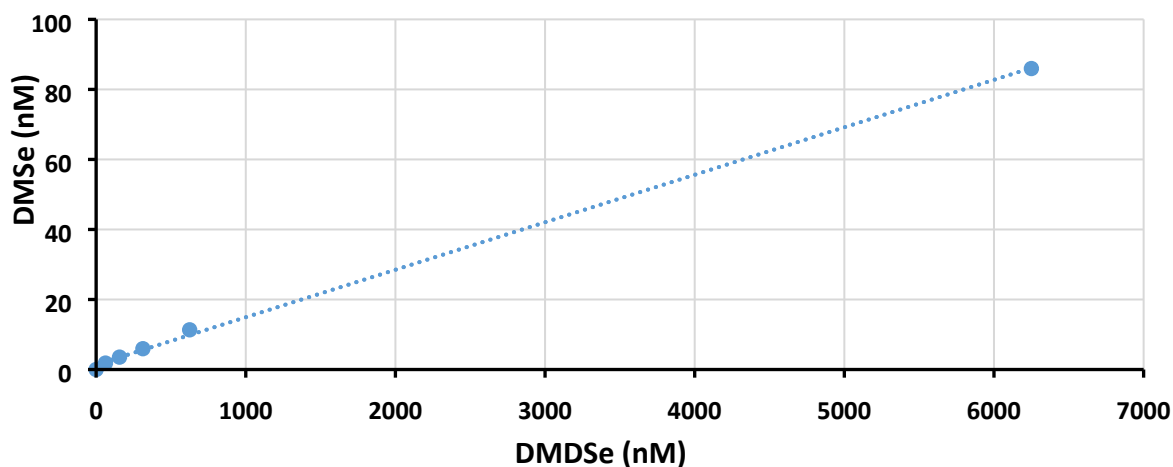

586

587 **Figure S23:** Measured DMS in DMDSe samples via DI-SPME-GC/MS. The slope of 0.0136 corresponds  
588 to 1.36 nM DMS in 100 nM DMDSe.

589

590 **References:**

- 591 1. Obata, T.; Araie, H.; Shiraiwa, Y., Bioconcentration mechanism of selenium by a  
592 coccolithophorid, *Emiliania huxleyi*. *Plant and cell physiology* **2004**, *45*, (10), 1434-1441.
- 593 2. Larsen, E. H.; Hansen, M.; Fan, T.; Vahl, M., Speciation of selenoamino acids, selenonium ions  
594 and inorganic selenium by ion exchange HPLC with mass spectrometric detection and its application  
595 to yeast and algae. *Journal of Analytical Atomic Spectrometry* **2001**, *16*, (12), 1403-1408.
- 596 3. Fan, T. W.; Lane, A. N.; Higashi, R. M., Selenium biotransformations by a euryhaline microalga  
597 isolated from a saline evaporation pond. *Environmental science & technology* **1997**, *31*, (2), 569-576.
- 598 4. Gómez-Jacinto, V.; García-Barrera, T.; Garbayo, I.; Vílchez, C.; Gómez-Ariza, J. L., Metallomic  
599 study of selenium biomolecules metabolized by the microalgae *Chlorella sorkiniana* in the  
600 biotechnological production of functional foods enriched in selenium. *Pure and Applied Chemistry*  
601 **2012**, *84*, (2), 269-280.
- 602 5. Wrench, J., Selenium metabolism in the marine phytoplankters *Tetraselmis tetrathele* and  
603 *Dunaliella minuta*. *Marine Biology* **1978**, *49*, (3), 231-236.
- 604 6. Bottino, N. R.; Banks, C. H.; Irgolic, K. J.; Micks, P.; Wheeler, A. E.; Zingaro, R. A., Selenium  
605 containing amino acids and proteins in marine algae. *Phytochemistry* **1984**, *23*, (11), 2445-2452.
- 606 7. Hu, M.; Yang, Y.; Martin, J.-M.; Yin, K.; Harrison, P., Preferential uptake of Se (IV) over Se (VI)  
607 and the production of dissolved organic Se by marine phytoplankton. *Marine Environmental*  
608 *Research* **1997**, *44*, (2), 225-231.
- 609 8. Amouroux, D.; Pécheyran, C.; Donard, O. F., Formation of volatile selenium species in  
610 synthetic seawater under light and dark experimental conditions. *Applied Organometallic Chemistry*  
611 **2000**, *14*, (5), 236-244.
- 612 9. Kiene, R. P.; Williams, L. P. H.; Walker, J. E., Seawater microorganisms have a high affinity  
613 glycine betaine uptake system which also recognizes dimethylsulfoniopropionate. *Aquatic microbial*  
614 *ecology* **1998**, *15*, (1), 39-51.
- 615 10. Brock, N. L.; Citron, C. A.; Zell, C.; Berger, M.; Wagner-Döbler, I.; Petersen, J.; Brinkhoff, T.;  
616 Simon, M.; Dickschat, J. S., Isotopically labeled sulfur compounds and synthetic selenium and  
617 tellurium analogues to study sulfur metabolism in marine bacteria. *Beilstein journal of organic*  
618 *chemistry* **2013**, *9*, (1), 942-950.
- 619 11. Van Fleet-Stalder, V.; Chasteen, T. G.; Pickering, I. J.; George, G. N.; Prince, R. C., Fate of  
620 Selenate and Selenite Metabolized by *Rhodobacter sphaeroides*. *Appl. Environ. Microbiol.* **2000**, *66*,  
621 (11), 4849-4853.
- 622 12. Ansedé, J. H.; Yoch, D. C., Comparison of selenium and sulfur volatilization by  
623 dimethylsulfoniopropionate lyase (DMSP) in two marine bacteria and estuarine sediments. *FEMS*  
624 *microbiology ecology* **1997**, *23*, (4), 315-324.
- 625 13. Dickschat, J. S.; Zell, C.; Brock, N. L., Pathways and substrate specificity of DMSP catabolism in  
626 marine bacteria of the *Roseobacter* clade. *ChemBioChem* **2010**, *11*, (3), 417-425.
- 627 14. Gabel-Jensen, C.; Lunøe, K.; Gammelgaard, B., Formation of methylselenol, dimethylselenide  
628 and dimethyldiselenide in in vitro metabolism models determined by headspace GC-MS. *Metallomics*  
629 **2010**, *2*, (2), 167-173.
- 630 15. Kumar, K.; Margerum, D. W., Kinetics and mechanism of general-acid-assisted oxidation of  
631 bromide by hypochlorite and hypochlorous acid. *Inorganic Chemistry* **1987**, *26*, (16), 2706-2711.
- 632 16. McCurry, D. L.; Quay, A. N.; Mitch, W. A., Ozone promotes chloropicrin formation by oxidizing  
633 amines to nitro compounds. *Environmental science & technology* **2016**, *50*, (3), 1209-1217.
- 634 17. Eaton, A. D.; Glesceri, L.; Greenberg, E. *Standard methods for the examination of water and*  
635 *wastewater*. New York; APHA-AWWA-WEF: 1998.
- 636 18. Hach Chlorine, Free and Total.  
637 <https://www.google.ch/url?sa=t&rct=j&q=&esrc=s&source=web&cd=&ved=2ahUKewim7JqQ8aDsAhVUTcAKHdaiCVkQFjABegQIAxAC&url=http%3A%2F%2Fwww.hach.com%2Fasset-get.download-en.jsa%3Ffid%3D7639984177&usq=AOvVaw1fgO-EnvUbrRQ38rXgVGec>  
638  
639

- 640 19. Heeb, M. B.; Criquet, J.; Zimmermann-Steffens, S. G.; von Gunten, U., Oxidative treatment of  
641 bromide-containing waters: formation of bromine and its reactions with inorganic and organic  
642 compounds--a critical review. *Water Res* **2014**, *48*, 15-42.
- 643 20. Heeb, M. B.; Kristiana, I.; Trogolo, D.; Arey, J. S.; Von Gunten, U., Formation and reactivity of  
644 inorganic and organic chloramines and bromamines during oxidative water treatment. *Water*  
645 *research* **2017**, *110*, 91-101.
- 646 21. Criquet, J.; Rodriguez, E. M.; Allard, S.; Wellauer, S.; Salhi, E.; Joll, C. A.; Von Gunten, U.,  
647 Reaction of bromine and chlorine with phenolic compounds and natural organic matter extracts--  
648 Electrophilic aromatic substitution and oxidation. *Water research* **2015**, *85*, 476-486.
- 649 22. Troy, R. C.; Margerum, D. W., Non-metal redox kinetics: Hypobromite and hypobromous acid  
650 reactions with iodide and with sulfite and the hydrolysis of bromosulfate. *Inorganic Chemistry* **1991**,  
651 *30*, (18), 3538-3543.
- 652 23. Vriens, B.; Mathis, M.; Winkel, L. H.; Berg, M., Quantification of volatile-alkylated selenium  
653 and sulfur in complex aqueous media using solid-phase microextraction. *Journal of Chromatography*  
654 *A* **2015**, *1407*, 11-20.
- 655 24. Hubaux, A.; Vos, G., Decision and detection limits for calibration curves. *Analytical chemistry*  
656 **1970**, *42*, (8), 849-855.
- 657 25. Dodd, M. C.; Buffle, M.-O.; Von Gunten, U., Oxidation of antibacterial molecules by aqueous  
658 ozone: moiety-specific reaction kinetics and application to ozone-based wastewater treatment.  
659 *Environmental science & technology* **2006**, *40*, (6), 1969-1977.
- 660 26. Brenton, A. G.; Godfrey, A. R., Accurate mass measurement: terminology and treatment of  
661 data. *Journal of the American Society for Mass Spectrometry* **2010**, *21*, (11), 1821-1835.
- 662 27. Loos, M.; Gerber, C.; Corona, F.; Hollender, J.; Singer, H., Accelerated isotope fine structure  
663 calculation using pruned transition trees. *Analytical chemistry* **2015**, *87*, (11), 5738-5744.
- 664 28. Pinkernell, U.; Nowack, B.; Gallard, H.; Von Gunten, U., Methods for the photometric  
665 determination of reactive bromine and chlorine species with ABTS. *Water Research* **2000**, *34*, (18),  
666 4343-4350.
- 667 29. Beckwith, R. C.; Wang, T. X.; Margerum, D. W., Equilibrium and kinetics of bromine  
668 hydrolysis. *Inorganic chemistry* **1996**, *35*, (4), 995-1000.
- 669 30. Liu, Q.; Margerum, D. W., Equilibrium and kinetics of bromine chloride hydrolysis.  
670 *Environmental science & technology* **2001**, *35*, (6), 1127-1133.
- 671 31. Sivey, J. D.; Arey, J. S.; Tentscher, P. R.; Roberts, A. L., Reactivity of BrCl, Br<sub>2</sub>, BrOCl, Br<sub>2</sub>O,  
672 and HOBr toward dimethenamid in solutions of bromide + aqueous free chlorine. *Environ Sci Technol*  
673 **2013**, *47*, (3), 1330-8.

674
